# Supplementary material for: A Novel Computational Method for the Identification of Potential miRNA-Disease Association Based on Symmetric Non-negative Matrix Factorization and Kronecker Regularized Least Square
Source: Front Genet. 2018 Aug 21;9:324. doi: 10.3389/fgene.2018.00324 (PMC6111239; doi:10.3389/fgene.2018.00324)
Supplement: Supplementary file 1 [file Table_1.xlsx]

## Sheet: Sheet1
Glioma	hsa-mir-19b	0.713681
Glioma	hsa-mir-19a	0.712325
Colorectal Neoplasms	hsa-mir-191	0.665771
Colorectal Neoplasms	hsa-let-7d	0.66445
Glioma	hsa-mir-92a	0.659975
Colorectal Neoplasms	hsa-let-7f	0.631246
Colorectal Neoplasms	hsa-let-7i	0.624666
Colorectal Neoplasms	hsa-mir-125a	0.615414
Colorectal Neoplasms	hsa-mir-29b	0.612804
Colorectal Neoplasms	hsa-mir-223	0.610987
Heart Failure	hsa-mir-331	0.608792
Colorectal Neoplasms	hsa-mir-24	0.606244
Colorectal Neoplasms	hsa-mir-101	0.591372
Carcinoma Hepatocellular	hsa-mir-34b	0.591337
Colonic Neoplasms	hsa-mir-135a	0.589847
Colorectal Neoplasms	hsa-mir-132	0.587303
Carcinoma, Squamous Cell	hsa-mir-17	0.578767
Colonic Neoplasms	hsa-mir-200a	0.578661
Glioma	hsa-mir-135b	0.578111
Colorectal Neoplasms	hsa-mir-192	0.564302
Ovarian Neoplasms	hsa-mir-151	0.562924
Colorectal Neoplasms	hsa-mir-30c	0.5517
Colorectal Neoplasms	hsa-mir-106b	0.551684
Autistic Disorder	hsa-mir-663	0.539126
Colorectal Neoplasms	hsa-let-7g	0.535771
Glioma	hsa-mir-153	0.534244
Mesothelioma	hsa-mir-19a	0.532879
Colonic Neoplasms	hsa-mir-92b	0.532625
Colonic Neoplasms	hsa-mir-135b	0.532201
Colonic Neoplasms	hsa-mir-183	0.531897
Colonic Neoplasms	hsa-mir-148a	0.528752
Colonic Neoplasms	hsa-mir-222	0.527904
Melanoma	hsa-mir-151	0.527766
Colorectal Neoplasms	hsa-mir-32	0.525574
Colonic Neoplasms	hsa-mir-210	0.523324
Carcinoma Hepatocellular	hsa-mir-143	0.519014
Stomach Neoplasms	hsa-mir-19b	0.518913
Glioma	hsa-mir-125a	0.517981
Colonic Neoplasms	hsa-mir-150	0.515202
Colorectal Neoplasms	hsa-mir-15a	0.514381
Carcinoma, Non-Small-Cell Lung	hsa-let-7c	0.506278
Colonic Neoplasms	hsa-mir-146b	0.505839
Stomach Neoplasms	hsa-mir-29b	0.500975
Colorectal Neoplasms	hsa-mir-205	0.500631
Colonic Neoplasms	hsa-mir-34b	0.499833
Colonic Neoplasms	hsa-mir-18b	0.499779
Pancreatic Neoplasms	hsa-mir-19a	0.496389
Colonic Neoplasms	hsa-mir-196a	0.496058
Colorectal Neoplasms	hsa-mir-296	0.492608
Colonic Neoplasms	hsa-mir-203	0.485996
Colonic Neoplasms	hsa-mir-139	0.484191
Carcinoma, Squamous Cell	hsa-mir-19a	0.484073
Colonic Neoplasms	hsa-mir-199a	0.482871
Colonic Neoplasms	hsa-mir-339	0.482414
Colonic Neoplasms	hsa-mir-181b	0.482383
Lupus Vulgaris	hsa-mir-663	0.4819
Melanoma	hsa-mir-30c	0.481325
Colonic Neoplasms	hsa-mir-195	0.47932
Stomach Neoplasms	hsa-mir-205	0.477859
Heart Failure	hsa-mir-20a	0.477759
Uterine Cervical Neoplasms	hsa-mir-18a	0.474978
Carcinoma Hepatocellular	hsa-mir-132	0.473786
Stomach Neoplasms	hsa-mir-92a	0.471184
Carcinoma Hepatocellular	hsa-mir-9	0.470846
Colonic Neoplasms	hsa-mir-199b	0.470731
Myocardial Infarction	hsa-mir-17	0.468686
Stomach Neoplasms	hsa-let-7d	0.468536
Colonic Neoplasms	hsa-mir-429	0.464315
Colonic Neoplasms	hsa-mir-130a	0.463966
Colonic Neoplasms	hsa-mir-338	0.461763
Muscular Disorders, Atrophic	hsa-mir-151	0.458305
Breast Neoplasms	hsa-mir-92b	0.458238
Breast Neoplasms	hsa-mir-151	0.457906
Stomach Neoplasms	hsa-mir-15b	0.455964
Stomach Neoplasms	hsa-mir-30d	0.454801
Colonic Neoplasms	hsa-mir-27a	0.453426
Pancreatic Neoplasms	hsa-mir-141	0.453308
Colonic Neoplasms	hsa-mir-26a	0.452723
Colonic Neoplasms	hsa-mir-25	0.451762
Glioma	hsa-mir-10a	0.44796
Carcinoma, Squamous Cell	hsa-mir-221	0.447282
Stomach Neoplasms	hsa-mir-210	0.446797
Colonic Neoplasms	hsa-mir-219	0.446078
Colonic Neoplasms	hsa-mir-133a	0.445969
Colonic Neoplasms	hsa-mir-194	0.445695
Melanoma	hsa-mir-181b	0.44437
Glioma	hsa-mir-146a	0.443683
Neoplasms	hsa-mir-146b	0.443447
Melanoma	hsa-mir-10b	0.440855
Colorectal Neoplasms	hsa-mir-302b	0.440671
Colonic Neoplasms	hsa-mir-95	0.440113
Colonic Neoplasms	hsa-mir-497	0.439549
Colonic Neoplasms	hsa-mir-181a	0.439545
Colonic Neoplasms	hsa-mir-96	0.439532
Colonic Neoplasms	hsa-mir-34c	0.439384
Colonic Neoplasms	hsa-mir-335	0.436458
Colonic Neoplasms	hsa-mir-372	0.436423
Melanoma	hsa-mir-92b	0.434655
Neoplasms	hsa-mir-451	0.43383
Colonic Neoplasms	hsa-mir-373	0.432925
Colonic Neoplasms	hsa-mir-215	0.432897
Stomach Neoplasms	hsa-let-7b	0.432571
Glioma	hsa-let-7a	0.432002
Carcinoma, Non-Small-Cell Lung	hsa-mir-20a	0.431011
Esophageal Neoplasms	hsa-mir-18a	0.43031
Neoplasms	hsa-mir-223	0.430254
Colonic Neoplasms	hsa-mir-93	0.429377
Colorectal Neoplasms	hsa-mir-23b	0.428456
Esophageal Neoplasms	hsa-mir-200b	0.428188
Lung Neoplasms	hsa-mir-195	0.428123
Colonic Neoplasms	hsa-mir-375	0.427407
Neoplasms	hsa-mir-135b	0.427023
Lung Neoplasms	hsa-mir-106b	0.426006
Leukemia, Myeloid, Acute	hsa-mir-34c	0.424019
Adenoviridae Infections	hsa-mir-19a	0.423287
Colonic Neoplasms	hsa-mir-148b	0.423199
Carcinoma, Renal Cell	hsa-mir-19b	0.422084
Glioma	hsa-mir-137	0.42187
Colonic Neoplasms	hsa-mir-124	0.420781
Pancreatic Neoplasms	hsa-mir-19b	0.420265
Colonic Neoplasms	hsa-mir-224	0.419613
Esophageal Neoplasms	hsa-mir-1	0.418937
Prostatic Neoplasms	hsa-mir-155	0.418599
Stomach Neoplasms	hsa-mir-451	0.41852
Vascular Diseases	hsa-mir-19b	0.417691
Carcinoma	hsa-mir-17	0.416482
Ovarian Neoplasms	hsa-mir-222	0.416047
Melanoma	hsa-mir-24	0.415221
Melanoma	hsa-mir-92a	0.414301
Colonic Neoplasms	hsa-mir-186	0.414011
Glioblastoma	hsa-mir-106b	0.413903
Prostatic Neoplasms	hsa-mir-429	0.411362
Colonic Neoplasms	hsa-mir-340	0.411311
Stomach Neoplasms	hsa-mir-203	0.411058
Carcinoma Hepatocellular	hsa-mir-135b	0.410879
Precursor Cell Lymphoblastic Leukemia-Lymphoma	hsa-mir-20a	0.410341
Stomach Neoplasms	hsa-mir-92b	0.410086
Lung Neoplasms	hsa-mir-92b	0.409662
Breast Neoplasms	hsa-mir-106a	0.409488
Glioma	hsa-mir-126	0.408113
Carcinoma Hepatocellular	hsa-mir-30e	0.408086
Multiple Myeloma	hsa-mir-155	0.40808
Colorectal Neoplasms	hsa-mir-629	0.407617
Carcinoma, Basal Cell	hsa-mir-20a	0.406265
Colonic Neoplasms	hsa-mir-182	0.406075
Carcinoma, Squamous Cell	hsa-mir-146b	0.405698
Adenoviridae Infections	hsa-mir-20a	0.403987
Prostatic Neoplasms	hsa-let-7e	0.403972
Urinary Bladder Neoplasms	hsa-mir-223	0.403702
Breast Neoplasms	hsa-mir-130a	0.403689
Pancreatic Neoplasms	hsa-mir-1	0.403677
Glioma	hsa-mir-203	0.402469
Carcinoma Hepatocellular	hsa-mir-95	0.401702
Carcinoma Hepatocellular	hsa-mir-23b	0.401413
Glioma	hsa-mir-376a	0.400334
Colonic Neoplasms	hsa-mir-342	0.400181
Pancreatic Neoplasms	hsa-mir-205	0.400011
Neoplasms	hsa-mir-195	0.400002
Colonic Neoplasms	hsa-mir-7	0.399866
Carcinoma, Renal Cell	hsa-mir-18a	0.398992
Glioblastoma	hsa-mir-15b	0.398609
Adenocarcinoma	hsa-mir-141	0.398079
Stomach Neoplasms	hsa-let-7e	0.397784
Head and Neck Neoplasms	hsa-mir-200b	0.397178
Ovarian Neoplasms	hsa-mir-7	0.396973
Colonic Neoplasms	hsa-mir-27b	0.396705
Glioblastoma	hsa-mir-92b	0.396341
Stomach Neoplasms	hsa-mir-15a	0.396102
Lung Neoplasms	hsa-mir-20b	0.39546
Colonic Neoplasms	hsa-mir-129	0.395317
Glioma	hsa-mir-142	0.395187
Glioblastoma	hsa-mir-135a	0.395078
Esophageal Neoplasms	hsa-mir-17	0.395019
Breast Neoplasms	hsa-mir-142	0.394941
Glioblastoma	hsa-mir-18b	0.394248
Colonic Neoplasms	hsa-mir-608	0.393842
Pancreatic Neoplasms	hsa-mir-127	0.393842
Carcinoma, Renal Cell	hsa-mir-125b	0.391484
Breast Neoplasms	hsa-mir-150	0.391278
Toxoplasma	hsa-mir-92a	0.391146
Colonic Neoplasms	hsa-mir-28	0.390681
Colonic Neoplasms	hsa-mir-646	0.390409
Melanoma	hsa-mir-223	0.389641
Prostatic Neoplasms	hsa-mir-210	0.389477
Pancreatic Neoplasms	hsa-mir-125a	0.38901
Breast Neoplasms	hsa-mir-451	0.388399
Carcinoma, Squamous Cell	hsa-let-7c	0.387787
Colonic Neoplasms	hsa-mir-211	0.387578
Stomach Neoplasms	hsa-let-7i	0.387322
Breast Neoplasms	hsa-mir-30e	0.386981
Leukemia, Myeloid, Acute	hsa-mir-16	0.386006
Urinary Bladder Neoplasms	hsa-mir-125a	0.385695
Carcinoma, Non-Small-Cell Lung	hsa-mir-10b	0.385142
Colonic Neoplasms	hsa-mir-367	0.384201
Glioma	hsa-mir-193a	0.383873
Ovarian Neoplasms	hsa-mir-143	0.383819
Colorectal Neoplasms	hsa-mir-498	0.383505
Colonic Neoplasms	hsa-mir-216b	0.382671
Colonic Neoplasms	hsa-mir-1915	0.382379
Breast Neoplasms	hsa-mir-372	0.38223
Head and Neck Neoplasms	hsa-mir-200a	0.381678
Colonic Neoplasms	hsa-mir-324	0.38154
Carcinoma, Renal Cell	hsa-mir-15a	0.381097
Colonic Neoplasms	hsa-mir-1280	0.381047
Carcinoma, Non-Small-Cell Lung	hsa-let-7f	0.381036
Glioma	hsa-mir-155	0.380645
lymphoma	hsa-mir-125b	0.379295
Carcinoma, Non-Small-Cell Lung	hsa-mir-194	0.379151
Colonic Neoplasms	hsa-mir-2110	0.379077
Atherosclerosis	hsa-mir-20a	0.378298
Carcinoma, Non-Small-Cell Lung	hsa-let-7i	0.378296
Glioblastoma	hsa-mir-29b	0.377412
medulloblastoma	hsa-mir-367	0.377224
Carcinoma, Squamous Cell	hsa-let-7a	0.377103
Stomach Neoplasms	hsa-mir-30a	0.376784
Ovarian Neoplasms	hsa-mir-203	0.376488
Colonic Neoplasms	hsa-mir-1303	0.376381
Colonic Neoplasms	hsa-mir-103b	0.376245
Glioblastoma	hsa-mir-24	0.376
Melanoma	hsa-mir-132	0.375754
Colonic Neoplasms	hsa-mir-33a	0.375686
Prostatic Neoplasms	hsa-let-7i	0.375468
Lung Neoplasms	hsa-mir-16	0.375303
Ovarian Neoplasms	hsa-mir-18b	0.374867
Colonic Neoplasms	hsa-mir-491	0.37338
Muscular Disorders, Atrophic	hsa-mir-206	0.373273
Colonic Neoplasms	hsa-mir-567	0.372389
Breast Neoplasms	hsa-mir-98	0.371639
Colonic Neoplasms	hsa-mir-1179	0.371612
Colonic Neoplasms	hsa-mir-185	0.371559
Glioma	hsa-mir-29b	0.371391
Colonic Neoplasms	hsa-mir-1273c	0.371119
Carcinoma, Renal Cell	hsa-mir-125a	0.371012
Glioma	hsa-let-7d	0.370684
Prostatic Neoplasms	hsa-let-7g	0.370681
Glioma	hsa-mir-199b	0.370657
Colonic Neoplasms	hsa-mir-1275	0.370342
Prostatic Neoplasms	hsa-mir-18a	0.370155
Carcinoma Hepatocellular	hsa-mir-32	0.369894
Colonic Neoplasms	hsa-mir-190a	0.3696
Stomach Neoplasms	hsa-mir-520b	0.369124
Colonic Neoplasms	hsa-mir-760	0.369105
Stomach Neoplasms	hsa-mir-99b	0.36841
Carcinoma, Non-Small-Cell Lung	hsa-mir-29a	0.367491
Stomach Neoplasms	hsa-mir-30e	0.366647
Toxoplasmosis	hsa-mir-19a	0.366144
Carcinoma, Non-Small-Cell Lung	hsa-mir-203	0.36605
Glioma	hsa-mir-148a	0.3657
Melanoma	hsa-mir-451	0.365455
Colonic Neoplasms	hsa-mir-99a	0.36534
Colonic Neoplasms	hsa-mir-206	0.36515
Colonic Neoplasms	hsa-mir-337	0.364967
Carcinoma, Squamous Cell	hsa-mir-150	0.364854
Colonic Neoplasms	hsa-mir-422a	0.363974
Prostatic Neoplasms	hsa-mir-19b	0.363681
Carcinoma Hepatocellular	hsa-mir-429	0.363664
Carcinoma, Non-Small-Cell Lung	hsa-mir-200a	0.362354
Carcinoma Hepatocellular	hsa-mir-133a	0.361829
medulloblastoma	hsa-mir-335	0.361715
Glioma	hsa-mir-29a	0.361399
Schizophrenia	hsa-mir-20a	0.361112
Breast Neoplasms	hsa-mir-192	0.360584
Colorectal Neoplasms	hsa-mir-424	0.360293
Colonic Neoplasms	hsa-mir-328	0.360039
Colonic Neoplasms	hsa-mir-638	0.358224
Ovarian Neoplasms	hsa-mir-205	0.35819
medulloblastoma	hsa-mir-302c	0.356947
Ovarian Neoplasms	hsa-mir-210	0.356905
Obesity	hsa-mir-20a	0.356868
Colonic Neoplasms	hsa-mir-423	0.356783
Colonic Neoplasms	hsa-mir-542	0.356568
Melanoma	hsa-mir-127	0.356452
Lung Neoplasms	hsa-mir-130a	0.356042
Melanoma	hsa-mir-29c	0.355461
Esophageal Neoplasms	hsa-mir-19b	0.354917
Colonic Neoplasms	hsa-mir-345	0.354277
Carcinoma, Renal Cell	hsa-mir-296	0.354137
Glioblastoma	hsa-mir-335	0.353899
Colonic Neoplasms	hsa-mir-1246	0.35355
Adenocarcinoma	hsa-mir-34a	0.353444
Urinary Bladder Neoplasms	hsa-mir-146b	0.353302
Prostatic Neoplasms	hsa-mir-125a	0.353184
Colorectal Neoplasms	hsa-mir-630	0.352548
Colonic Neoplasms	hsa-mir-492	0.352051
Ovarian Neoplasms	hsa-mir-29c	0.351991
Esophageal Neoplasms	hsa-mir-125b	0.351796
Colonic Neoplasms	hsa-mir-144	0.350351
Colonic Neoplasms	hsa-mir-297	0.350322
Hepatitis, Chronic	hsa-mir-122	0.350267
Colonic Neoplasms	hsa-mir-147b	0.349891
Neoplasms	hsa-mir-107	0.348279
Hypertrophy, Left Ventricular	hsa-mir-1	0.348161
Glioma	hsa-mir-504	0.347901
medulloblastoma	hsa-mir-146b	0.347546
Osteosarcoma	hsa-mir-155	0.347449
Glioma	hsa-mir-338	0.346765
Colonic Neoplasms	hsa-mir-625	0.346523
Glioma	hsa-mir-127	0.346422
Prostatic Neoplasms	hsa-let-7f	0.346358
Glioma	hsa-mir-29c	0.34594
Stomach Neoplasms	hsa-mir-28	0.345523
Colonic Neoplasms	hsa-mir-483	0.345487
Neoplasms	hsa-mir-194	0.345432
Prostatic Neoplasms	hsa-mir-196a	0.34539
Glioma	hsa-mir-452	0.345286
Prostatic Neoplasms	hsa-mir-18b	0.345175
Colonic Neoplasms	hsa-mir-301a	0.345035
Antiphospholipid Syndrome	hsa-mir-17	0.34497
Stomach Neoplasms	hsa-mir-133a	0.344962
Breast Neoplasms	hsa-mir-15b	0.344792
Glioma	hsa-mir-219	0.344604
Urinary Bladder Neoplasms	hsa-mir-29a	0.344314
Melanoma	hsa-mir-150	0.344308
Carcinoma, Squamous Cell	hsa-mir-199b	0.34428
Carcinoma, Ehrlich Tumor	hsa-mir-200c	0.34374
Stomach Neoplasms	hsa-mir-23b	0.343647
Leukemia, Myeloid, Acute	hsa-mir-21	0.343047
Adenocarcinoma	hsa-mir-125b	0.342913
Colonic Neoplasms	hsa-mir-193a	0.34291
Esophageal Neoplasms	hsa-let-7d	0.342729
Heart Failure	hsa-let-7i	0.342064
Colorectal Neoplasms	hsa-mir-128	0.341511
Carcinoma, Renal Cell	hsa-mir-194	0.34136
Urinary Bladder Neoplasms	hsa-mir-194	0.340983
Colorectal Neoplasms	hsa-mir-365b	0.340784
lymphoma	hsa-mir-223	0.340634
Glioma	hsa-mir-30c	0.340579
medulloblastoma	hsa-mir-302a	0.339378
Carcinoma, Non-Small-Cell Lung	hsa-mir-181b	0.338712
Prostatic Neoplasms	hsa-mir-19a	0.338212
Colorectal Neoplasms	hsa-mir-15b	0.337675
Melanoma	hsa-mir-139	0.337545
medulloblastoma	hsa-mir-20b	0.337318
Melanoma	hsa-mir-135a	0.336959
Colorectal Neoplasms	hsa-mir-214	0.336783
Carcinoma, Non-Small-Cell Lung	hsa-mir-132	0.336044
Glioma	hsa-mir-323a	0.336008
Pancreatic Neoplasms	hsa-mir-9	0.335504
Colorectal Neoplasms	hsa-mir-365a	0.33541
Colonic Neoplasms	hsa-mir-454	0.335319
Carcinoma, Renal Cell	hsa-mir-1	0.335188
Stomach Neoplasms	hsa-mir-338	0.335126
Carcinoma, Squamous Cell	hsa-mir-92b	0.334695
Uterine Cervical Neoplasms	hsa-mir-1	0.334625
Retinoblastoma	hsa-mir-21	0.33455
Carcinoma, Basal Cell	hsa-mir-19a	0.334404
Lung Neoplasms	hsa-mir-15a	0.333844
Breast Neoplasms	hsa-mir-32	0.333365
Nephrosclerosis	hsa-mir-200c	0.33276
Esophageal Neoplasms	hsa-mir-142	0.332318
Asthma	hsa-mir-222	0.33188
Glioma	hsa-mir-210	0.331853
Carcinoma, Renal Cell	hsa-mir-20a	0.331647
Hepatitis C	hsa-mir-17	0.331612
medulloblastoma	hsa-mir-15b	0.331541
Colorectal Neoplasms	hsa-mir-622	0.331488
Pancreatic Neoplasms	hsa-mir-135a	0.331387
Carcinoma, Squamous Cell	hsa-mir-183	0.331297
Esophageal Neoplasms	hsa-let-7e	0.33113
Lupus Erythematosus, Systemic	hsa-mir-19a	0.330572
Breast Neoplasms	hsa-mir-99b	0.33043
Stomach Neoplasms	hsa-mir-339	0.329934
Lung Neoplasms	hsa-mir-141	0.32982
Azoospermia	hsa-mir-371	0.32926
Colorectal Neoplasms	hsa-mir-29c	0.328964
Head and Neck Neoplasms	hsa-mir-146a	0.328943
Esophageal Neoplasms	hsa-mir-16	0.328237
Prostatic Neoplasms	hsa-mir-199b	0.328034
Carcinoma, Renal Cell	hsa-mir-192	0.327889
Carcinoma Hepatocellular	hsa-mir-194	0.327598
Stomach Neoplasms	hsa-mir-26a	0.327336
Glioblastoma	hsa-mir-125a	0.32713
Glioma	hsa-mir-15a	0.326755
Head and Neck Neoplasms	hsa-mir-126	0.325958
Colonic Neoplasms	hsa-mir-451a	0.32544
Urinary Bladder Neoplasms	hsa-mir-106b	0.325189
Lymphoma, B-Cell	hsa-mir-221	0.325153
Neoplasms	hsa-mir-1	0.324686
Prostatic Neoplasms	hsa-mir-29c	0.324379
Biliary Tract Neoplasms	hsa-let-7g	0.323662
Lung Neoplasms	hsa-mir-520b	0.323147
Heart Failure	hsa-let-7g	0.322851
Carcinoma, Non-Small-Cell Lung	hsa-mir-106b	0.322564
Colorectal Neoplasms	hsa-mir-1290	0.322454
Reperfusion Injury	hsa-mir-17	0.322225
Colonic Neoplasms	hsa-mir-574	0.322122
Prostatic Neoplasms	hsa-mir-192	0.321819
Colonic Neoplasms	hsa-mir-499a	0.321632
Myelodysplastic Syndromes	hsa-mir-126	0.321367
Nasopharyngeal Neoplasms	hsa-mir-19a	0.321335
Breast Neoplasms	hsa-mir-28	0.320918
Uterine Cervical Neoplasms	hsa-mir-200c	0.320795
Colorectal Neoplasms	hsa-mir-449a	0.320766
Adrenocortical Carcinoma	hsa-mir-21	0.320758
Colonic Neoplasms	hsa-mir-208a	0.320735
Colonic Neoplasms	hsa-mir-708	0.320632
Leukemia, Myeloid, Acute	hsa-mir-125a	0.320281
Adenocarcinoma	hsa-mir-18a	0.320224
Ovarian Neoplasms	hsa-mir-15a	0.320164
Carcinoma, Renal Cell	hsa-mir-29a	0.31996
Atrial Fibrillation	hsa-mir-18a	0.319532
Prostatic Neoplasms	hsa-mir-142	0.319525
Carcinoma, Non-Small-Cell Lung	hsa-let-7e	0.319347
Leukemia, Myeloid, Acute	hsa-mir-29c	0.31915
Carcinoma, Non-Small-Cell Lung	hsa-mir-142	0.319003
Colorectal Neoplasms	hsa-mir-493	0.319001
Urinary Bladder Neoplasms	hsa-let-7a	0.318936
Colonic Neoplasms	hsa-mir-103a	0.318729
Glioma	hsa-mir-205	0.318626
Colorectal Neoplasms	hsa-mir-30d	0.318345
Lupus Erythematosus, Systemic	hsa-mir-29a	0.318307
Melanoma	hsa-mir-335	0.317891
lymphoma	hsa-mir-34a	0.317689
medulloblastoma	hsa-mir-93	0.31766
medulloblastoma	hsa-mir-18b	0.317486
Urinary Bladder Neoplasms	hsa-mir-204	0.316902
Stomach Neoplasms	hsa-let-7c	0.31646
Urinary Bladder Neoplasms	hsa-mir-16	0.316419
Glioblastoma	hsa-mir-214	0.316301
Colorectal Neoplasms	hsa-mir-506	0.316076
Atherosclerosis	hsa-mir-1	0.31589
Colonic Neoplasms	hsa-mir-320a	0.315134
Lupus Erythematosus, Systemic	hsa-mir-18a	0.314914
Head and Neck Neoplasms	hsa-mir-210	0.314874
Carcinoma, Non-Small-Cell Lung	hsa-mir-30c	0.314858
Colon Neoplasms	hsa-mir-20a	0.314554
Carcinoma, Squamous Cell	hsa-mir-200b	0.314244
Neoplasms	hsa-mir-30b	0.314213
Osteosarcoma	hsa-mir-146a	0.314204
Carcinoma Hepatocellular	hsa-mir-196b	0.314142
Retinoblastoma	hsa-mir-221	0.314131
Prostatic Neoplasms	hsa-mir-9	0.313583
Carcinoma Hepatocellular	hsa-mir-27b	0.313571
Prostatic Neoplasms	hsa-mir-449b	0.31354
Ovarian Neoplasms	hsa-mir-132	0.313487
Colonic Neoplasms	hsa-mir-26b	0.313335
lymphoma	hsa-mir-9	0.313296
Carcinoma, Renal Cell	hsa-mir-30a	0.313193
Melanoma	hsa-mir-95	0.313131
Ependymoma	hsa-mir-20a	0.312759
Carcinoma, Renal Cell	hsa-mir-130a	0.31269
Colorectal Neoplasms	hsa-mir-100	0.312513
Prostatic Neoplasms	hsa-mir-181a	0.312381
medulloblastoma	hsa-mir-221	0.312319
Stomach Neoplasms	hsa-mir-215	0.311975
Glioblastoma	hsa-mir-196a	0.311804
Carcinoma, Non-Small-Cell Lung	hsa-mir-375	0.311313
Glioma	hsa-let-7f	0.311251
Adenocarcinoma	hsa-mir-106b	0.311107
Leukemia-Lymphoma, Adult T-Cell	hsa-mir-125b	0.310794
Neoplasms	hsa-mir-215	0.310708
Glioma	hsa-let-7i	0.310292
Ovarian Neoplasms	hsa-mir-142	0.310226
Prostatic Neoplasms	hsa-mir-24	0.309625
Ovarian Neoplasms	hsa-mir-106a	0.309569
Melanoma	hsa-mir-130a	0.309311
Glioma	hsa-mir-223	0.309115
Colonic Neoplasms	hsa-mir-652	0.3089
Prostatic Neoplasms	hsa-mir-135a	0.308659
Colonic Neoplasms	hsa-mir-362	0.308471
Colorectal Neoplasms	hsa-mir-615	0.308435
Vascular Diseases	hsa-mir-92a	0.308428
Melanoma	hsa-mir-101	0.308243
Inflammation	hsa-mir-29b	0.308166
Carcinoma, Non-Small-Cell Lung	hsa-mir-191	0.307894
Neoplasms	hsa-mir-196a	0.307857
Lymphoma, T-Cell	hsa-mir-155	0.307647
Neoplasms	hsa-mir-151	0.307395
medulloblastoma	hsa-mir-7	0.307301
Stomach Neoplasms	hsa-mir-452	0.307092
Glioblastoma	hsa-mir-204	0.307078
Hypertrophy	hsa-mir-222	0.306985
Melanoma	hsa-mir-27a	0.30695
Carcinoma, Non-Small-Cell Lung	hsa-mir-127	0.306785
Digestive System Neoplasms	hsa-mir-221	0.306784
Neoplasms	hsa-mir-339	0.306601
Ovarian Neoplasms	hsa-mir-199b	0.30655
Head and Neck Neoplasms	hsa-mir-92a	0.306042
Melanoma	hsa-mir-224	0.305843
Carcinoma, Renal Cell	hsa-mir-17	0.30573
Atrial Fibrillation	hsa-mir-1	0.305645
Neoplasms	hsa-mir-203	0.305358
Glioblastoma	hsa-mir-30e	0.30492
Pancreatic Neoplasms	hsa-mir-18b	0.304772
Ovarian Neoplasms	hsa-mir-181a	0.30477
Carcinoma, Renal Cell	hsa-mir-223	0.304536
medulloblastoma	hsa-mir-137	0.304267
Carcinoma, Squamous Cell	hsa-mir-199a	0.304225
Osteosarcoma	hsa-mir-106b	0.304033
Mesothelioma	hsa-mir-145	0.3038
Multiple Sclerosis	hsa-mir-20a	0.30334
Glioma	hsa-let-7c	0.303334
Stomach Neoplasms	hsa-mir-151	0.303203
Urinary Bladder Neoplasms	hsa-mir-30d	0.302904
Arthritis, Rheumatoid	hsa-mir-17	0.302886
Leukemia	hsa-mir-145	0.302832
Lung Neoplasms	hsa-mir-429	0.302251
medulloblastoma	hsa-mir-542	0.301842
Heart Failure	hsa-mir-34a	0.30168
Carcinoma, Non-Small-Cell Lung	hsa-mir-95	0.301482
Retinoblastoma	hsa-mir-9	0.301477
Colonic Neoplasms	hsa-mir-149	0.301343
medulloblastoma	hsa-mir-214	0.301292
Lymphoma, Mantle-Cell	hsa-mir-155	0.301242
Leukemia, Myeloid, Acute	hsa-mir-146b	0.300918
Ovarian Neoplasms	hsa-mir-24	0.300034
Lymphoma, B-Cell	hsa-mir-125b	0.299696
Carcinoma, Renal Cell	hsa-mir-22	0.299453
Colorectal Neoplasms	hsa-mir-502	0.299441
Carcinoma, Renal Cell	hsa-mir-18b	0.29912
Glioblastoma	hsa-mir-96	0.298813
Glioma	hsa-mir-25	0.298749
Stomach Neoplasms	hsa-mir-367	0.298522
Pancreatic Neoplasms	hsa-mir-30a	0.298492
Esophageal Neoplasms	hsa-mir-199b	0.297219
Colonic Neoplasms	hsa-mir-122	0.297044
Colonic Neoplasms	hsa-mir-378a	0.296805
Neoplasms	hsa-mir-32	0.296651
Colonic Neoplasms	hsa-mir-15b	0.29663
Neoplasms	hsa-mir-153	0.296526
Glioblastoma	hsa-mir-127	0.296493
medulloblastoma	hsa-mir-138	0.295752
Prostatic Neoplasms	hsa-mir-150	0.295488
Neoplasms	hsa-mir-181d	0.295356
Glioblastoma	hsa-mir-383	0.294564
Colorectal Neoplasms	hsa-mir-98	0.294322
Glioblastoma	hsa-mir-200c	0.294212
Carcinoma Hepatocellular	hsa-mir-28	0.294206
Endometrial Neoplasms	hsa-mir-203	0.293963
Uterine Cervical Neoplasms	hsa-mir-92a	0.293862
Urinary Bladder Neoplasms	hsa-mir-106a	0.293773
Head and Neck Neoplasms	hsa-mir-22	0.293744
Arthritis, Rheumatoid	hsa-mir-92a	0.293328
Colonic Neoplasms	hsa-mir-23a	0.293146
Lung Neoplasms	hsa-mir-451	0.293017
medulloblastoma	hsa-mir-215	0.292834
Glioma	hsa-mir-491	0.292772
Melanoma	hsa-mir-196b	0.292537
Stomach Neoplasms	hsa-mir-98	0.292201
medulloblastoma	hsa-mir-200b	0.291882
Prostatic Neoplasms	hsa-mir-10b	0.291708
Head and Neck Neoplasms	hsa-mir-222	0.291561
Hepatitis B	hsa-mir-222	0.29143
Carcinoma, Non-Small-Cell Lung	hsa-mir-224	0.291121
Leukemia, Myeloid, Acute	hsa-mir-199a	0.290912
Waldenstrom Macroglobulinemia	hsa-mir-561	0.290727
Stomach Neoplasms	hsa-mir-99a	0.290642
Glioma	hsa-mir-361	0.290624
Colorectal Neoplasms	hsa-mir-552	0.290571
Colon Neoplasms	hsa-mir-143	0.290561
Carcinoma, Renal Cell	hsa-mir-98	0.290553
medulloblastoma	hsa-mir-149	0.29037
Endometrial Neoplasms	hsa-mir-218	0.290334
Ovarian Neoplasms	hsa-mir-204	0.28995
Nasopharyngeal Neoplasms	hsa-mir-21	0.289652
Carcinoma Hepatocellular	hsa-mir-658	0.2895
Carcinoma Hepatocellular	hsa-mir-186	0.289393
Melanoma	hsa-mir-373	0.289208
Esophageal Neoplasms	hsa-mir-125a	0.28907
Pancreatic Neoplasms	hsa-mir-30d	0.288954
Leukemia, Lymphocytic, Chronic, B-Cell	hsa-mir-126	0.288679
Glioma	hsa-let-7g	0.288598
Osteosarcoma	hsa-mir-125a	0.288475
Glioblastoma	hsa-mir-150	0.288426
Leukemia, Myeloid, Acute	hsa-mir-101	0.288424
Esophageal Neoplasms	hsa-mir-194	0.288304
Stomach Neoplasms	hsa-mir-10a	0.288283
Esophageal Neoplasms	hsa-mir-429	0.288016
Colorectal Neoplasms	hsa-mir-20b	0.287671
Esophageal Neoplasms	hsa-mir-218	0.287495
Retinoblastoma	hsa-mir-135a	0.287487
Carcinoma, Renal Cell	hsa-mir-92b	0.287322
Urinary Bladder Neoplasms	hsa-mir-30c	0.287265
Arthritis, Rheumatoid	hsa-mir-20a	0.287112
Breast Neoplasms	hsa-mir-186	0.28711
Ovarian Neoplasms	hsa-mir-107	0.286591
Glioblastoma	hsa-mir-200a	0.28652
Carcinoma, Squamous Cell	hsa-mir-200a	0.286331
Pancreatic Neoplasms	hsa-mir-451	0.286306
Glioma	hsa-let-7b	0.286002
Carcinoma Hepatocellular	hsa-mir-340	0.28588
Carcinoma, Renal Cell	hsa-mir-221	0.285839
Mesothelioma	hsa-mir-29b	0.285746
Lymphoma, B-Cell	hsa-mir-24	0.285731
Melanoma	hsa-mir-199b	0.285601
Carcinoma, Squamous Cell	hsa-mir-93	0.285443
Glioblastoma	hsa-mir-135b	0.285442
Uterine Cervical Neoplasms	hsa-mir-200b	0.285441
Breast Neoplasms	hsa-mir-130b	0.285355
Carcinoma Hepatocellular	hsa-mir-137	0.285265
Head and Neck Neoplasms	hsa-mir-19a	0.284915
Adenocarcinoma	hsa-mir-222	0.28465
Heart Failure	hsa-mir-214	0.284541
Colonic Neoplasms	hsa-mir-520a	0.284527
Stomach Neoplasms	hsa-mir-219	0.284248
Stomach Neoplasms	hsa-mir-153	0.284117
Carcinoma Hepatocellular	hsa-mir-376c	0.283324
medulloblastoma	hsa-mir-204	0.283071
Carcinoma Hepatocellular	hsa-mir-451	0.282859
Digestive System Neoplasms	hsa-mir-98	0.28232
Glioma	hsa-mir-101	0.281952
Neoplasms	hsa-mir-296	0.281922
Glioma	hsa-mir-186	0.281832
Lung Neoplasms	hsa-mir-296	0.281328
Neoplasms	hsa-mir-183	0.281298
Carcinoma, Renal Cell	hsa-mir-25	0.281194
Carcinoma	hsa-mir-143	0.281052
Breast Neoplasms	hsa-mir-95	0.281004
Mycosis Fungoides	hsa-let-7g	0.28067
Head and Neck Neoplasms	hsa-mir-19b	0.280668
Urinary Bladder Neoplasms	hsa-mir-20b	0.280639
Carcinoma, Squamous Cell	hsa-mir-451	0.280503
Carcinoma, Squamous Cell	hsa-mir-224	0.280476
Prostatic Neoplasms	hsa-mir-20b	0.280469
Periodontitis	hsa-mir-20a	0.280394
Lymphoma, Primary Effusion	hsa-mir-155	0.280388
Urinary Bladder Neoplasms	hsa-mir-135a	0.280368
Melanoma	hsa-mir-98	0.280085
Glioblastoma	hsa-mir-93	0.280031
Mouth Neoplasms	hsa-mir-200b	0.280019
Colonic Neoplasms	hsa-mir-30d	0.279693
Uterine Cervical Neoplasms	hsa-mir-106b	0.279554
Glioma	hsa-mir-34c	0.279419
Ovarian Neoplasms	hsa-mir-372	0.279372
Urinary Bladder Neoplasms	hsa-mir-191	0.279347
Head and Neck Neoplasms	hsa-mir-127	0.279177
Precursor Cell Lymphoblastic Leukemia-Lymphoma	hsa-mir-155	0.279041
Carcinoma, Non-Small-Cell Lung	hsa-mir-133a	0.278947
Hepatitis B	hsa-let-7b	0.278664
Adenocarcinoma	hsa-mir-101	0.278609
Carcinoma, Squamous Cell	hsa-mir-135a	0.278435
Carcinoma Hepatocellular	hsa-mir-193b	0.278408
Ovarian Neoplasms	hsa-mir-195	0.278275
Prostatic Neoplasms	hsa-mir-151	0.278068
Carcinoma, Squamous Cell	hsa-mir-23b	0.277995
Carcinoma, Non-Small-Cell Lung	hsa-mir-24	0.277875
Cholangiocarcinoma	hsa-mir-200a	0.277607
Urinary Bladder Neoplasms	hsa-mir-181a	0.277585
Pancreatic Neoplasms	hsa-mir-29a	0.277412
Osteosarcoma	hsa-mir-126	0.277298
Lung Neoplasms	hsa-mir-15b	0.277054
Glioma	hsa-mir-539	0.276765
Gastrointestinal Neoplasms	hsa-let-7b	0.276693
Uterine Cervical Neoplasms	hsa-mir-146b	0.276662
Colorectal Neoplasms	hsa-mir-451	0.276382
Uterine Cervical Neoplasms	hsa-mir-429	0.276042
Glioblastoma	hsa-mir-199b	0.27596
Colonic Neoplasms	hsa-mir-29c	0.27546
Pancreatic Neoplasms	hsa-mir-93	0.275271
Stomach Neoplasms	hsa-mir-491	0.275182
Carcinoma, Renal Cell	hsa-mir-30e	0.274854
Ovarian Neoplasms	hsa-mir-135a	0.274774
Lymphoma, B-Cell	hsa-mir-223	0.274679
Carcinoma, Non-Small-Cell Lung	hsa-mir-18b	0.274612
Glioblastoma	hsa-mir-223	0.274469
Ovarian Neoplasms	hsa-mir-181b	0.274214
Colonic Neoplasms	hsa-mir-214	0.274204
Glioblastoma	hsa-let-7c	0.274135
Neuroblastoma	hsa-mir-125b	0.274006
Retinoblastoma	hsa-mir-145	0.273836
Ovarian Neoplasms	hsa-mir-373	0.273815
Carcinoma, Non-Small-Cell Lung	hsa-mir-18a	0.273784
Colorectal Neoplasms	hsa-mir-518c	0.273392
Esophageal Neoplasms	hsa-mir-221	0.273142
lymphoma	hsa-mir-195	0.272943
Lupus Erythematosus, Systemic	hsa-mir-203	0.272682
Urinary Bladder Neoplasms	hsa-mir-92b	0.272465
Carcinoma Hepatocellular	hsa-mir-302a	0.272327
Stomach Neoplasms	hsa-mir-96	0.272233
Leukemia, Lymphocytic, Chronic, B-Cell	hsa-mir-142	0.272065
medulloblastoma	hsa-mir-139	0.272052
Glioblastoma	hsa-mir-34b	0.271833
Ovarian Neoplasms	hsa-mir-196a	0.271605
Melanoma	hsa-mir-32	0.271396
Leukemia, Myeloid, Acute	hsa-mir-191	0.271173
Esophageal Neoplasms	hsa-let-7i	0.270689
Lupus Erythematosus, Systemic	hsa-mir-223	0.27053
Carcinoma Hepatocellular	hsa-mir-339	0.27003
Carcinoma, Renal Cell	hsa-mir-20b	0.269976
Carcinoma, Squamous Cell	hsa-mir-26a	0.26995
Osteosarcoma	hsa-mir-29c	0.269915
Head and Neck Neoplasms	hsa-mir-20a	0.269888
Ovarian Neoplasms	hsa-mir-196b	0.269839
Heart Failure	hsa-mir-30d	0.269805
Mesothelioma	hsa-let-7d	0.269581
Urinary Bladder Neoplasms	hsa-mir-214	0.269381
Retinoblastoma	hsa-mir-107	0.269258
medulloblastoma	hsa-mir-106b	0.268955
Carcinoma, Squamous Cell	hsa-mir-132	0.26886
Carcinoma, Non-Small-Cell Lung	hsa-mir-22	0.268671
Long QT Syndrome	hsa-mir-1	0.268659
Glioma	hsa-mir-193b	0.268394
Neoplasms	hsa-mir-100	0.268064
Stomach Neoplasms	hsa-mir-542	0.268008
Glioblastoma	hsa-mir-203	0.267937
Carcinoma, Small Cell	hsa-mir-126	0.267896
Neoplasms	hsa-mir-383	0.267887
Stomach Neoplasms	hsa-mir-181d	0.267605
Carcinoma, Non-Small-Cell Lung	hsa-mir-19a	0.26734
Uterine Cervical Neoplasms	hsa-mir-199a	0.267051
Glioma	hsa-mir-200a	0.267023
Antiphospholipid Syndrome	hsa-mir-19a	0.266895
Carcinoma Hepatocellular	hsa-mir-452	0.26686
Urinary Bladder Neoplasms	hsa-mir-23b	0.266617
Pancreatic Neoplasms	hsa-mir-27b	0.266563
Retinoblastoma	hsa-mir-31	0.266515
Breast Neoplasms	hsa-mir-196b	0.266507
Breast Neoplasms	hsa-mir-449b	0.266497
Nasopharyngeal Neoplasms	hsa-mir-19b	0.266252
Crohn Disease	hsa-mir-29b	0.265508
Carcinoma	hsa-mir-181b	0.265301
Carcinoma, Renal Cell	hsa-mir-214	0.265211
Precursor Cell Lymphoblastic Leukemia-Lymphoma	hsa-mir-145	0.265131
Colonic Neoplasms	hsa-mir-100	0.264963
medulloblastoma	hsa-mir-107	0.264649
Urinary Bladder Neoplasms	hsa-mir-451	0.264537
Myelodysplastic Syndromes	hsa-mir-18a	0.26445
Gastrointestinal Neoplasms	hsa-let-7d	0.264411
Carcinoma, Non-Small-Cell Lung	hsa-mir-141	0.26429
Heart Failure	hsa-mir-9	0.264286
Prostatic Neoplasms	hsa-mir-372	0.264051
Adenocarcinoma	hsa-mir-1	0.263981
Leukemia	hsa-mir-155	0.263657
Leukemia	hsa-mir-126	0.263512
Endometriosis	hsa-mir-18a	0.2634
Esophageal Neoplasms	hsa-mir-195	0.26326
Leukemia, lymphoblastic, Acute	hsa-mir-222	0.263256
Carcinoma Hepatocellular	hsa-mir-299	0.263142
Neoplasms	hsa-mir-133a	0.262976
Huntington Disease	hsa-mir-34c	0.262948
Melanoma	hsa-mir-497	0.262781
Adenocarcinoma	hsa-mir-151	0.262753
Melanoma	hsa-mir-100	0.262491
Carcinoma, Renal Cell	hsa-mir-30b	0.2624
Kidney Neoplasms	hsa-mir-200a	0.262309
Influenza, Human	hsa-mir-29b	0.262208
Carcinoma, Squamous Cell	hsa-let-7e	0.262188
Carcinoma, Non-Small-Cell Lung	hsa-mir-139	0.262039
Melanoma	hsa-mir-206	0.261953
Head and Neck Neoplasms	hsa-mir-10b	0.261905
Prostatic Neoplasms	hsa-mir-92b	0.261883
Lung Neoplasms	hsa-mir-194	0.261862
Mesothelioma	hsa-mir-34a	0.261846
Head and Neck Neoplasms	hsa-mir-99b	0.261745
Heart Failure	hsa-mir-125b	0.261585
Pancreatic Neoplasms	hsa-mir-181c	0.261381
Lymphoma, Large B-Cell, Diffuse	hsa-mir-222	0.261251
Gastrointestinal Neoplasms	hsa-mir-21	0.261206
Urinary Bladder Neoplasms	hsa-mir-18b	0.260993
Carcinoma, Squamous Cell	hsa-mir-139	0.260993
Thyroid Neoplasms	hsa-mir-34c	0.260919
Colonic Neoplasms	hsa-mir-98	0.260907
Hepatitis B	hsa-mir-17	0.26087
Prostatic Neoplasms	hsa-mir-95	0.260522
Carcinoma, Non-Small-Cell Lung	hsa-mir-451	0.260297
Osteosarcoma	hsa-mir-34b	0.260055
Carcinoma, Non-Small-Cell Lung	hsa-mir-23b	0.260055
Heart Failure	hsa-mir-15a	0.259954
Hodgkin Disease	hsa-mir-15a	0.259844
Leukemia, Myeloid, Acute	hsa-mir-200b	0.259805
Retinoblastoma	hsa-mir-181a	0.259804
Carcinoma, Renal Cell	hsa-mir-196b	0.259784
Carcinoma, Non-Small-Cell Lung	hsa-mir-192	0.259522
Carcinoma, Renal Cell	hsa-mir-135b	0.259408
Urinary Bladder Neoplasms	hsa-let-7d	0.259179
Breast Neoplasms	hsa-mir-212	0.259135
Adenocarcinoma	hsa-mir-375	0.259053
Adenocarcinoma	hsa-mir-214	0.259023
Uterine Cervical Neoplasms	hsa-mir-222	0.258931
Carcinoma, Non-Small-Cell Lung	hsa-mir-25	0.25892
Adenocarcinoma	hsa-mir-34c	0.258918
Eosinophilic Esophagitis	hsa-mir-221	0.25884
Osteosarcoma	hsa-let-7a	0.258743
Endometriosis	hsa-mir-155	0.258731
medulloblastoma	hsa-mir-128	0.258715
Colorectal Neoplasms	hsa-mir-30e	0.258681
Colorectal Neoplasms	hsa-mir-30b	0.25846
Esophageal Neoplasms	hsa-mir-30a	0.258381
Glioblastoma	hsa-mir-373	0.258224
Carcinoma Hepatocellular	hsa-mir-663	0.257883
Glioblastoma	hsa-mir-30d	0.25744
Ovarian Neoplasms	hsa-mir-15b	0.257307
Carcinoma Hepatocellular	hsa-mir-449a	0.257289
Osteosarcoma	hsa-mir-146b	0.257283
Colon Neoplasms	hsa-mir-21	0.257264
Pancreatic Neoplasms	hsa-mir-33a	0.257094
Glioblastoma	hsa-mir-132	0.256889
Endometriosis	hsa-mir-98	0.256855
Endometrial Neoplasms	hsa-mir-145	0.25654
Carcinoma	hsa-mir-218	0.256416
Urinary Bladder Neoplasms	hsa-mir-150	0.256404
Head and Neck Neoplasms	hsa-mir-183	0.25638
Carcinoma, Renal Cell	hsa-mir-222	0.256342
Carcinoma, Renal Cell	hsa-mir-29b	0.256287
Eclampsia	hsa-mir-221	0.256263
medulloblastoma	hsa-mir-181a	0.256119
Atherosclerosis	hsa-mir-223	0.256043
Thyroid Neoplasms	hsa-mir-203	0.25589
Myelodysplastic Syndromes	hsa-mir-19b	0.255886
Kidney Neoplasms	hsa-mir-200b	0.255862
Carcinoma, Squamous Cell	hsa-mir-7	0.255713
Endometrial Neoplasms	hsa-mir-126	0.255661
Carcinoma, Squamous Cell	hsa-mir-192	0.255654
Antiphospholipid Syndrome	hsa-mir-18a	0.255607
Esophageal Neoplasms	hsa-mir-222	0.255476
Prostatic Neoplasms	hsa-mir-215	0.255354
Glioma	hsa-let-7e	0.255308
Glioma	hsa-mir-497	0.255272
Endometriosis	hsa-mir-19b	0.255271
Carcinoma, Non-Small-Cell Lung	hsa-mir-92a	0.255057
Crohn Disease	hsa-let-7i	0.255051
Rectal Neoplasms	hsa-mir-126	0.254239
Retinoblastoma	hsa-mir-106b	0.254078
Retinoblastoma	hsa-mir-125b	0.254059
Carcinoma, Squamous Cell	hsa-mir-181c	0.254005
medulloblastoma	hsa-mir-152	0.253973
Carcinoma, Squamous Cell	hsa-mir-141	0.253844
Carcinoma	hsa-mir-126	0.253642
Lung Neoplasms	hsa-mir-23b	0.253638
Carcinoma, Squamous Cell	hsa-mir-658	0.253626
Nasopharyngeal Neoplasms	hsa-mir-221	0.25353
Melanoma	hsa-mir-99b	0.253479
Carcinoma, Squamous Cell	hsa-mir-206	0.25341
Ovarian Neoplasms	hsa-mir-98	0.253272
Glioblastoma	hsa-mir-363	0.253217
Adrenocortical Carcinoma	hsa-mir-20a	0.253188
Glioblastoma	hsa-mir-126	0.253072
Eosinophilic Esophagitis	hsa-mir-155	0.252853
Glioblastoma	hsa-mir-141	0.252656
Carcinoma, Renal Cell	hsa-mir-133a	0.252451
Heart Failure	hsa-mir-191	0.252422
Glioblastoma	hsa-let-7f	0.252346
Nasopharyngeal Neoplasms	hsa-mir-34a	0.251831
Urinary Bladder Neoplasms	hsa-mir-132	0.251788
Thyroid Neoplasms	hsa-let-7a	0.251586
Retinoblastoma	hsa-mir-146b	0.25157
Carcinoma, Squamous Cell	hsa-mir-29a	0.251382
Carcinoma Hepatocellular	hsa-mir-424	0.251246
Carcinoma, Squamous Cell	hsa-let-7g	0.251229
Adrenocortical Carcinoma	hsa-mir-221	0.251187
Uterine Cervical Neoplasms	hsa-let-7a	0.250843
Lung Neoplasms	hsa-mir-139	0.250813
Carcinoma, Renal Cell	hsa-mir-191	0.250753
Adrenocortical Adenoma	hsa-mir-100	0.250696
Pancreatic Neoplasms	hsa-mir-106b	0.250691
Pancreatic Neoplasms	hsa-mir-181a	0.250677
Myotonic Dystrophy	hsa-mir-29a	0.250655
Carcinoma, Squamous Cell	hsa-mir-196a	0.250607
Glioblastoma	hsa-mir-451	0.250471
Breast Neoplasms	hsa-mir-449a	0.250403
Carcinoma, Squamous Cell	hsa-mir-25	0.25037
Colonic Neoplasms	hsa-mir-451	0.249856
Pancreatic Neoplasms	hsa-mir-219	0.249593
Scleroderma, Localized	hsa-mir-29b	0.249402
Precursor Cell Lymphoblastic Leukemia-Lymphoma	hsa-mir-21	0.249344
Lupus Erythematosus, Systemic	hsa-mir-127	0.249197
Lung Neoplasms	hsa-mir-28	0.24899
lymphoma	hsa-mir-221	0.248968
Glioma	hsa-mir-192	0.248949
Prostatic Neoplasms	hsa-mir-7	0.24888
Esophageal Neoplasms	hsa-mir-107	0.248769
Carcinoma, Squamous Cell	hsa-mir-191	0.248755
Heart Failure	hsa-mir-29c	0.248564
Esophageal Neoplasms	hsa-mir-30c	0.248556
Myelodysplastic Syndromes	hsa-mir-146b	0.248495
medulloblastoma	hsa-mir-410	0.248366
Glioma	hsa-mir-26a	0.248085
Lymphoma, B-Cell	hsa-mir-126	0.248023
Uterine Cervical Neoplasms	hsa-mir-141	0.248006
Carcinoma, Renal Cell	hsa-mir-151	0.247976
Urinary Bladder Neoplasms	hsa-let-7b	0.247956
Carcinoma	hsa-mir-210	0.247794
Esophageal Neoplasms	hsa-mir-18b	0.247746
Ischemia	hsa-mir-29a	0.247708
Glioblastoma	hsa-mir-27a	0.247699
Ovarian Neoplasms	hsa-mir-206	0.247621
Carcinoma, Renal Cell	hsa-mir-10a	0.24754
Thyroid Neoplasms	hsa-mir-145	0.247299
Coronary Artery Disease	hsa-mir-133a	0.246995
Obesity	hsa-mir-19a	0.246931
Carcinoma, Non-Small-Cell Lung	hsa-mir-28	0.246882
Carcinoma Hepatocellular	hsa-mir-216b	0.24685
Esophageal Neoplasms	hsa-mir-133b	0.246602
Glioblastoma	hsa-mir-191	0.246501
Neuroblastoma	hsa-mir-16	0.246428
medulloblastoma	hsa-mir-16	0.246414
Head and Neck Neoplasms	hsa-mir-17	0.246331
Glioma	hsa-mir-34b	0.246144
Multiple Myeloma	hsa-mir-146a	0.246077
Esophageal Neoplasms	hsa-mir-127	0.245983
Prostatic Neoplasms	hsa-mir-139	0.245673
Ovarian Neoplasms	hsa-mir-10a	0.245292
Head and Neck Neoplasms	hsa-mir-16	0.244834
Carcinoma Hepatocellular	hsa-mir-206	0.244693
Thyroid Neoplasms	hsa-mir-34a	0.244531
Glioma	hsa-mir-22	0.244365
Endometrial Neoplasms	hsa-mir-99b	0.24416
medulloblastoma	hsa-mir-101	0.2441
Biliary Tract Neoplasms	hsa-mir-221	0.243999
Muscular Disorders, Atrophic	hsa-mir-1	0.243889
Ovarian Neoplasms	hsa-mir-520b	0.243865
Carcinoma, Renal Cell	hsa-mir-15b	0.243488
Endometrial Neoplasms	hsa-mir-143	0.243464
Cardiomegaly	hsa-mir-133b	0.243425
Carcinoma, Non-Small-Cell Lung	hsa-mir-204	0.243364
medulloblastoma	hsa-mir-222	0.2429
Carcinoma, Squamous Cell	hsa-mir-127	0.242895
Stomach Neoplasms	hsa-mir-23a	0.242508
Lupus Erythematosus, Systemic	hsa-mir-143	0.24238
Colorectal Neoplasms	hsa-mir-196b	0.242351
Adrenocortical Carcinoma	hsa-mir-99b	0.242227
Carcinoma	hsa-mir-141	0.242078
Retinoblastoma	hsa-mir-30e	0.242009
Pancreatic Neoplasms	hsa-mir-195	0.241904
Stomach Neoplasms	hsa-mir-424	0.241764
Angina, Unstable	hsa-mir-17	0.24168
Melanoma	hsa-mir-133b	0.241655
Diabetic Nephropathies	hsa-mir-141	0.241596
Glioma	hsa-mir-191	0.241571
Leukemia	hsa-mir-181b	0.241521
Heart Failure	hsa-mir-143	0.241472
Retinoblastoma	hsa-mir-7	0.241467
Melanoma	hsa-mir-192	0.241455
Breast Neoplasms	hsa-mir-198	0.241454
Breast Neoplasms	hsa-mir-99a	0.241381
Alzheimer Disease	hsa-mir-34b	0.241322
Carcinoma Hepatocellular	hsa-mir-151	0.241269
Cardiomegaly	hsa-mir-21	0.241247
Toxoplasmosis	hsa-mir-19b	0.241241
Mycosis Fungoides	hsa-let-7c	0.241223
Glomerulonephritis, IGA	hsa-mir-141	0.241208
Urinary Bladder Neoplasms	hsa-let-7c	0.241063
Glioblastoma	hsa-mir-26b	0.240993
Gastrointestinal Neoplasms	hsa-let-7f	0.240886
lymphoma	hsa-mir-224	0.240754
Oligodendroglioma	hsa-mir-124	0.240737
Glioma	hsa-mir-376c	0.240494
medulloblastoma	hsa-mir-372	0.240484
Carcinoma Hepatocellular	hsa-mir-184	0.240478
Digestive System Neoplasms	hsa-mir-222	0.240392
Liver Cirrhosis	hsa-mir-1	0.239998
Heart Failure	hsa-mir-146a	0.239997
Leukemia, Myeloid, Acute	hsa-mir-18b	0.239984
Breast Neoplasms	hsa-mir-337	0.239856
Carcinoma	hsa-mir-106a	0.239824
Carcinoma Hepatocellular	hsa-mir-342	0.239445
lymphoma	hsa-mir-145	0.239389
Leukemia, Myeloid, Acute	hsa-mir-32	0.239095
Pancreatic Neoplasms	hsa-mir-98	0.238965
Pancreatic Neoplasms	hsa-mir-33b	0.238674
Leukemia, Myeloid, Acute	hsa-mir-451	0.238566
Adrenocortical Carcinoma	hsa-mir-200a	0.237937
Neuroblastoma	hsa-mir-20b	0.237631
Retinoblastoma	hsa-mir-18b	0.237465
Carcinoma, Renal Cell	hsa-mir-24	0.237408
Endometrial Neoplasms	hsa-mir-34c	0.237145
Myocytes, Cardiac	hsa-mir-1	0.237062
Carcinoma, Renal Cell	hsa-mir-183	0.237027
Glioblastoma	hsa-mir-124	0.236961
Carcinoma, Squamous Cell	hsa-mir-340	0.236944
Thyroid Neoplasms	hsa-let-7c	0.23687
Lupus Erythematosus, Systemic	hsa-mir-16	0.236679
Astrocytoma	hsa-mir-31	0.236573
Cicatrix	hsa-mir-29a	0.23644
Inflammation	hsa-mir-146b	0.236405
Glioblastoma	hsa-mir-215	0.235898
Lupus Erythematosus, Systemic	hsa-mir-92a	0.235836
Heart Failure	hsa-mir-20b	0.235349
Mycosis Fungoides	hsa-let-7i	0.235192
Glioblastoma	hsa-mir-107	0.235172
Carcinoma, Squamous Cell	hsa-mir-99b	0.235082
Endometrial Neoplasms	hsa-mir-95	0.234909
Astrocytoma	hsa-mir-222	0.234884
Carcinoma, Non-Small-Cell Lung	hsa-mir-26a	0.234766
Stomach Neoplasms	hsa-mir-301b	0.234612
Melanoma	hsa-mir-10a	0.234581
Carcinoma, Renal Cell	hsa-mir-193b	0.234494
Carcinoma, Non-Small-Cell Lung	hsa-mir-30b	0.234226
Glioblastoma	hsa-mir-1	0.234158
Adenocarcinoma	hsa-mir-19a	0.234048
Uterine Cervical Neoplasms	hsa-mir-199b	0.233717
Carcinoma, Non-Small-Cell Lung	hsa-mir-31	0.233662
Endometrial Neoplasms	hsa-mir-133b	0.233494
Osteosarcoma	hsa-mir-31	0.233465
Liver Neoplasms	hsa-mir-200c	0.233345
medulloblastoma	hsa-mir-195	0.233274
Uterine Cervical Neoplasms	hsa-mir-125a	0.232988
Leukemia, Myeloid, Acute	hsa-mir-9	0.232977
Breast Neoplasms	hsa-mir-421	0.232745
Stomach Neoplasms	hsa-mir-198	0.232639
Pancreatic Neoplasms	hsa-mir-99b	0.232639
Carcinoma, Renal Cell	hsa-mir-181b	0.232607
Carcinoma, Non-Small-Cell Lung	hsa-mir-107	0.232549
Lung Neoplasms	hsa-mir-10a	0.232511
lymphoma	hsa-let-7a	0.2325
Ovarian Neoplasms	hsa-mir-23b	0.232256
Gastrointestinal Neoplasms	hsa-mir-155	0.232222
medulloblastoma	hsa-mir-181d	0.231959
Carcinoma, Non-Small-Cell Lung	hsa-mir-195	0.231666
Lymphoma, T-Cell	hsa-mir-16	0.231597
Esophageal Neoplasms	hsa-mir-29a	0.231516
medulloblastoma	hsa-mir-27b	0.231448
Heart Failure	hsa-mir-141	0.231406
Endometrial Neoplasms	hsa-mir-10b	0.231406
Precursor Cell Lymphoblastic Leukemia-Lymphoma	hsa-mir-222	0.2312
Adrenal Cortex Neoplasms	hsa-mir-130a	0.231109
Colorectal Neoplasms	hsa-mir-302c	0.230758
Gastrointestinal Neoplasms	hsa-mir-145	0.230609
Liposarcoma	hsa-let-7d	0.230554
Glioblastoma	hsa-mir-542	0.23047
Breast Neoplasms	hsa-mir-491	0.230453
Heart Failure	hsa-mir-221	0.23032
Melanoma	hsa-mir-372	0.230312
Leukemia, Lymphocytic, Chronic, B-Cell	hsa-mir-150	0.229952
Leukemia, Myeloid, Acute	hsa-mir-92b	0.229947
Muscular Dystrophy, Facioscapulohumeral	hsa-mir-206	0.229871
Colonic Neoplasms	hsa-mir-20b	0.229603
SARS Virus	hsa-mir-20a	0.229569
Glioma	hsa-mir-30d	0.22951
Lung Diseases, Interstitial	hsa-mir-18a	0.229482
Glioma	hsa-mir-23b	0.229369
Liver Neoplasms	hsa-mir-29b	0.229286
Glioma	hsa-mir-342	0.229029
Glioblastoma	hsa-let-7g	0.228849
Stomach Neoplasms	hsa-mir-383	0.228815
Glioma	hsa-mir-200c	0.228702
Carcinoma, Squamous Cell	hsa-mir-30e	0.228651
Adrenocortical Carcinoma	hsa-let-7e	0.228424
Hepatitis B	hsa-mir-21	0.228404
Eosinophilic Esophagitis	hsa-mir-29a	0.228264
Prostatic Neoplasms	hsa-mir-302b	0.228244
Thyroid Neoplasms	hsa-mir-27a	0.228102
Glioma	hsa-mir-339	0.228031
medulloblastoma	hsa-mir-30e	0.227987
Esophageal Neoplasms	hsa-mir-106a	0.227958
Endometrial Neoplasms	hsa-mir-125a	0.227761
Mesothelioma	hsa-mir-191	0.227682
lymphoma	hsa-mir-31	0.227599
Prostatic Neoplasms	hsa-mir-30a	0.227571
Thyroid Neoplasms	hsa-mir-101	0.22752
Carcinoma, Renal Cell	hsa-mir-140	0.226768
Precursor Cell Lymphoblastic Leukemia-Lymphoma	hsa-mir-142	0.226699
Liposarcoma	hsa-let-7i	0.226687
Endometriosis	hsa-mir-21	0.226599
Carcinoma Hepatocellular	hsa-mir-494	0.226374
Colonic Neoplasms	hsa-mir-30e	0.226338
Urinary Bladder Neoplasms	hsa-mir-206	0.22633
Pancreatic Neoplasms	hsa-mir-30b	0.226258
Urinary Bladder Neoplasms	hsa-mir-25	0.22611
medulloblastoma	hsa-mir-326	0.225881
Adenocarcinoma	hsa-mir-10a	0.225866
Melanoma	hsa-mir-516b	0.225557
Glioblastoma	hsa-let-7b	0.225536
Leukemia	hsa-mir-663	0.225528
Prostatic Neoplasms	hsa-mir-137	0.225501
Colon Neoplasms	hsa-mir-155	0.225448
Lymphoma, B-Cell	hsa-mir-92b	0.225418
Carcinoma, Non-Small-Cell Lung	hsa-mir-196b	0.225307
Esophageal Neoplasms	hsa-mir-10b	0.225259
Colorectal Neoplasms	hsa-mir-130b	0.225077
Prostate Neoplasms	hsa-mir-96	0.224958
Glioma	hsa-mir-935	0.224811
Glioblastoma	hsa-mir-197	0.224718
Carcinoma, Non-Small-Cell Lung	hsa-mir-32	0.224716
Adenocarcinoma	hsa-let-7c	0.224714
Glioblastoma	hsa-mir-182	0.224645
Multiple Myeloma	hsa-mir-126	0.224535
Carcinoma, Squamous Cell	hsa-let-7f	0.22451
medulloblastoma	hsa-mir-24	0.224491
medulloblastoma	hsa-mir-27a	0.224468
Uterine Cervical Neoplasms	hsa-mir-210	0.224459
Carcinoma, Non-Small-Cell Lung	hsa-mir-206	0.224402
Precursor Cell Lymphoblastic Leukemia-Lymphoma	hsa-mir-18a	0.224365
Lung Neoplasms	hsa-mir-302b	0.224182
Glioblastoma	hsa-mir-138	0.22395
Prostatic Neoplasms	hsa-mir-424	0.223939
Neoplasms	hsa-mir-192	0.223729
Carcinoma, Renal Cell	hsa-mir-153	0.223529
Carcinoma Hepatocellular	hsa-mir-367	0.223439
Hepatitis B	hsa-mir-19b	0.223337
Endometrial Neoplasms	hsa-mir-221	0.223183
Esophageal Neoplasms	hsa-mir-191	0.222974
Neoplasms	hsa-mir-26b	0.222865
Inflammation	hsa-mir-15a	0.222777
Carcinoma Hepatocellular	hsa-mir-185	0.222772
Endometrial Neoplasms	hsa-mir-133a	0.222661
Neoplasms	hsa-mir-23b	0.222615
Lung Neoplasms	hsa-mir-193b	0.222603
Carcinoma, Renal Cell	hsa-mir-198	0.222562
Hepatitis B	hsa-mir-146b	0.222537
Uterine Cervical Neoplasms	hsa-mir-148a	0.22224
Leukemia, Lymphocytic, Chronic, B-Cell	hsa-mir-20b	0.222215
Osteosarcoma	hsa-mir-214	0.222133
Stomach Neoplasms	hsa-mir-144	0.22203
Thyroid Neoplasms	hsa-mir-181b	0.221988
Thyroid Neoplasms	hsa-mir-223	0.221945
Carcinoma, Renal Cell	hsa-mir-132	0.221942
Barrett Esophagus	hsa-mir-126	0.221884
Head and Neck Neoplasms	hsa-mir-150	0.221758
Myelodysplastic Syndromes	hsa-mir-150	0.221699
Stomach Neoplasms	hsa-mir-148a	0.221688
medulloblastoma	hsa-mir-375	0.221658
Osteosarcoma	hsa-mir-598	0.22161
Mouth Neoplasms	hsa-let-7a	0.22158
Endometriosis	hsa-mir-34a	0.221448
Parkinson Disease	hsa-mir-30d	0.221442
Lymphoma, B-Cell	hsa-mir-26a	0.221399
Glioma	hsa-mir-372	0.221346
Prostatic Neoplasms	hsa-mir-30b	0.221161
Inflammation	hsa-mir-223	0.221144
Esophageal Neoplasms	hsa-mir-497	0.221023
Uterine Cervical Neoplasms	hsa-mir-204	0.22097
Endometriosis	hsa-mir-449a	0.220858
medulloblastoma	hsa-mir-151	0.22079
Carcinoma, Squamous Cell	hsa-mir-135b	0.22076
Uterine Cervical Neoplasms	hsa-let-7d	0.220474
Stomach Neoplasms	hsa-mir-510	0.220405
Stomach Neoplasms	hsa-mir-299	0.220291
Head and Neck Neoplasms	hsa-mir-34c	0.220216
Carcinoma, Renal Cell	hsa-mir-212	0.220202
Endometrial Neoplasms	hsa-mir-181a	0.220093
Pancreatic Neoplasms	hsa-mir-497	0.220089
Carcinoma, Renal Cell	hsa-mir-520b	0.220078
Ovarian Neoplasms	hsa-mir-26a	0.220029
Breast Neoplasms	hsa-mir-381	0.220018
Atherosclerosis	hsa-mir-125b	0.219838
Glioblastoma	hsa-mir-375	0.219777
Asthma	hsa-mir-98	0.219434
Carcinoma, Squamous Cell	hsa-mir-96	0.219352
Mesothelioma	hsa-mir-93	0.219144
lymphoma	hsa-mir-29a	0.218991
Neoplasms	hsa-mir-376c	0.218897
Uterine Cervical Neoplasms	hsa-mir-93	0.218781
Carcinoma, Non-Small-Cell Lung	hsa-mir-20b	0.218723
Carcinoma Hepatocellular	hsa-mir-26b	0.218598
Uterine Cervical Neoplasms	hsa-mir-10b	0.218568
Adenocarcinoma	hsa-mir-19b	0.218355
Glioblastoma	hsa-mir-133a	0.218065
Adenoviridae Infections	hsa-mir-30d	0.218017
Pancreatic Neoplasms	hsa-mir-198	0.21801
Inflammation	hsa-mir-17	0.218001
Carcinoma	hsa-mir-429	0.217998
Multiple Myeloma	hsa-mir-34a	0.217993
Urinary Bladder Neoplasms	hsa-mir-124	0.217945
Colonic Neoplasms	hsa-mir-30b	0.217916
Lymphoma, B-Cell	hsa-mir-20b	0.217889
Neoplasms	hsa-mir-342	0.217887
Uterine Cervical Neoplasms	hsa-mir-223	0.217803
Adenoviridae Infections	hsa-mir-29a	0.217696
Endometriosis	hsa-mir-210	0.217291
Precursor B-Cell Lymphoblastic Leukemia-Lymphoma	hsa-mir-221	0.217289
Uterine Cervical Neoplasms	hsa-mir-15a	0.217282
Stomach Neoplasms	hsa-mir-211	0.217273
Carcinoma Hepatocellular	hsa-mir-215	0.217249
Ovarian Neoplasms	hsa-mir-451	0.217241
Urinary Bladder Neoplasms	hsa-mir-151	0.217198
Esophageal Neoplasms	hsa-mir-9	0.217155
Endometriosis	hsa-mir-146a	0.217104
Hepatitis B	hsa-mir-20a	0.217066
Hepatitis B	hsa-mir-29b	0.217066
Head and Neck Neoplasms	hsa-mir-218	0.217049
Neoplasms	hsa-mir-26a	0.216986
Glioma	hsa-mir-33b	0.216875
Atrial Fibrillation	hsa-mir-21	0.216713
Liver Neoplasms	hsa-let-7g	0.216571
Ovarian Neoplasms	hsa-mir-27b	0.216447
Stomach Neoplasms	hsa-mir-488	0.216417
Leukemia, lymphoblastic, Acute	hsa-mir-125b	0.216396
Thyroid Neoplasms	hsa-mir-99a	0.216342
Ovarian Neoplasms	hsa-mir-150	0.216257
Pancreatic Neoplasms	hsa-mir-22	0.216131
Retinoblastoma	hsa-mir-92b	0.216081
Lymphoma, B-Cell	hsa-mir-106b	0.215996
Endometriosis	hsa-mir-29b	0.215943
Esophageal Neoplasms	hsa-let-7f	0.215884
Neoplasms, Squamous Cell	hsa-mir-20a	0.215861
Pancreatic Neoplasms	hsa-mir-29c	0.215856
Thyroid Neoplasms	hsa-mir-20a	0.215782
Multiple Myeloma	hsa-mir-542	0.215527
Urinary Bladder Neoplasms	hsa-mir-122	0.215479
Melanoma	hsa-mir-516a	0.215459
Biliary Tract Neoplasms	hsa-let-7e	0.21544
Breast Neoplasms	hsa-mir-185	0.215416
Adrenocortical Carcinoma	hsa-mir-223	0.215403
Adenocarcinoma	hsa-mir-146a	0.21508
medulloblastoma	hsa-mir-544b	0.214979
lymphoma	hsa-mir-183	0.214957
Glioblastoma	hsa-mir-181b	0.214876
Carcinoma, Basal Cell	hsa-mir-92a	0.214875
Uterine Cervical Neoplasms	hsa-mir-302c	0.214708
Osteosarcoma	hsa-mir-181d	0.214692
Neoplasms	hsa-mir-95	0.214663
Urinary Bladder Neoplasms	hsa-let-7e	0.214533
Crohn Disease	hsa-mir-200a	0.214285
Pulmonary Disease, Chronic Obstructive	hsa-mir-17	0.214194
Glioblastoma	hsa-mir-34c	0.214149
Prostate Neoplasms	hsa-mir-182	0.214141
Glioma	hsa-mir-95	0.213957
Neoplasms	hsa-mir-142	0.213824
Lung Neoplasms	hsa-mir-373	0.213819
Gastrointestinal Neoplasms	hsa-mir-486	0.213803
Choriocarcinoma	hsa-mir-143	0.213788
Leukemia, Myeloid, Acute	hsa-mir-141	0.213744
Glioblastoma	hsa-mir-130b	0.213676
Breast Neoplasms	hsa-mir-330	0.213658
Glomerulonephritis, IGA	hsa-mir-200c	0.213654
Glioma	hsa-mir-144	0.213647
Stomach Neoplasms	hsa-mir-197	0.213637
Schizophrenia	hsa-mir-18a	0.213581
medulloblastoma	hsa-mir-211	0.213563
Leukemia, Myeloid, Acute	hsa-mir-22	0.213439
Esophageal Neoplasms	hsa-mir-132	0.213339
Neoplasms	hsa-mir-488	0.212836
Carcinoma, Renal Cell	hsa-mir-302d	0.21278
Schizophrenia	hsa-mir-146a	0.212757
medulloblastoma	hsa-mir-544a	0.212698
Pre-Eclampsia	hsa-mir-29a	0.212611
Carcinoma, Renal Cell	hsa-mir-182	0.212541
Adenocarcinoma	hsa-mir-218	0.212533
Colorectal Neoplasms	hsa-mir-302a	0.212487
Leukemia, Myeloid, Acute	hsa-mir-339	0.212166
Toxoplasmosis	hsa-mir-92a	0.212122
Carcinoma, Basal Cell	hsa-mir-34a	0.212032
Glioma	hsa-mir-548d	0.211995
Myocardial Infarction	hsa-mir-146a	0.211916
Mouth Neoplasms	hsa-mir-146a	0.211866
Lung Neoplasms	hsa-mir-153	0.211846
Myelodysplastic Syndromes	hsa-mir-223	0.211836
Glioma	hsa-mir-513c	0.211832
Scleroderma, Systemic	hsa-mir-125b	0.211765
Hepatitis B	hsa-mir-199a	0.211723
Glioblastoma	hsa-mir-221	0.211543
Pituitary Neoplasms	hsa-mir-98	0.211537
Vascular Diseases	hsa-mir-155	0.211491
Stomach Neoplasms	hsa-mir-337	0.211452
Carcinoma	hsa-mir-92a	0.211438
Brain Ischemia	hsa-mir-124	0.21139
Glioma	hsa-mir-513b	0.211118
Leukemia, Promyelocytic, Acute	hsa-mir-181c	0.211098
lymphoma	hsa-mir-181b	0.210986
Inflammation	hsa-mir-98	0.210866
Gastrointestinal Neoplasms	hsa-mir-10b	0.210844
Adenocarcinoma	hsa-mir-7	0.210808
Osteosarcoma	hsa-mir-222	0.210785
Carcinoma, Squamous Cell	hsa-mir-22	0.210742
Leukemia, Lymphocytic, Chronic, B-Cell	hsa-mir-125a	0.21072
Leukemia, lymphoblastic, Acute	hsa-mir-223	0.21066
Hepatitis B	hsa-mir-133a	0.210655
Cholesteatoma	hsa-mir-222	0.210619
Mouth Neoplasms	hsa-mir-145	0.210514
Colorectal Neoplasms	hsa-mir-99b	0.210462
Neoplasms	hsa-mir-130a	0.21041
Melanoma	hsa-mir-520b	0.210407
Retinoblastoma	hsa-mir-214	0.210347
Leukemia, Myeloid, Acute	hsa-mir-106a	0.210236
Carcinoma, Renal Cell	hsa-mir-181a	0.2102
Mouth Neoplasms	hsa-mir-100	0.210181
Nasopharyngeal Neoplasms	hsa-mir-92a	0.210024
Esophageal Neoplasms	hsa-mir-424	0.210023
Prostatic Neoplasms	hsa-mir-451	0.209722
Neuroblastoma	hsa-mir-29a	0.209628
Neuroblastoma	hsa-mir-135a	0.209523
Retinoblastoma	hsa-mir-138	0.209522
Retinoblastoma	hsa-mir-20b	0.209434
Muscular Disorders, Atrophic	hsa-let-7b	0.209207
Neuroblastoma	hsa-mir-18b	0.209134
Carcinoma, Non-Small-Cell Lung	hsa-mir-19b	0.209092
Endometrial Neoplasms	hsa-mir-223	0.209048
Leukemia, Myeloid, Acute	hsa-mir-200a	0.209039
Neoplasms	hsa-mir-219	0.20888
Esophageal Neoplasms	hsa-mir-146b	0.208833
Carcinoma, Renal Cell	hsa-mir-27b	0.208757
Glioma	hsa-mir-181c	0.208692
Endometrial Neoplasms	hsa-mir-34b	0.20864
Liver Neoplasms	hsa-mir-31	0.208468
Colon Neoplasms	hsa-mir-125b	0.208425
Nervous System Diseases	hsa-mir-29a	0.208422
Uterine Cervical Neoplasms	hsa-mir-151	0.208396
Hepatitis B	hsa-mir-92a	0.208374
Myelodysplastic Syndromes	hsa-mir-29b	0.208341
Adrenocortical Carcinoma	hsa-mir-182	0.208341
Multiple Myeloma	hsa-mir-494	0.208276
Neuroblastoma	hsa-mir-125a	0.208215
Carcinoma	hsa-mir-9	0.207995
Head and Neck Neoplasms	hsa-mir-144	0.207945
Leukemia, Myeloid, Acute	hsa-mir-575	0.207938
medulloblastoma	hsa-mir-451a	0.207937
Thyroid Neoplasms	hsa-mir-19a	0.207835
Glioblastoma	hsa-mir-193b	0.207832
Ependymoma	hsa-mir-18a	0.207795
Glioma	hsa-mir-199a	0.207771
Lung Neoplasms	hsa-mir-424	0.207758
Retinoblastoma	hsa-mir-16	0.207649
Heart Failure	hsa-mir-101	0.207634
Pancreatic Neoplasms	hsa-mir-129	0.207564
Myotonic Dystrophy	hsa-mir-222	0.207554
Stomach Neoplasms	hsa-mir-376a	0.207385
Liver Failure	hsa-mir-222	0.207338
Ovarian Neoplasms	hsa-mir-154	0.207295
lymphoma	hsa-mir-142	0.207245
Adenocarcinoma	hsa-mir-127	0.207224
Leukemia, Lymphocytic, Chronic, B-Cell	hsa-mir-9	0.207174
Myocardial Infarction	hsa-mir-107	0.207147
Osteosarcoma	hsa-mir-9	0.207108
Lung Neoplasms	hsa-mir-196b	0.207105
Alopecia	hsa-mir-222	0.207015
Carcinoma	hsa-mir-181a	0.206879
Prostatic Neoplasms	hsa-mir-376c	0.206687
Gastrointestinal Neoplasms	hsa-mir-141	0.206596
Glioma	hsa-mir-194	0.206565
Myotonic Dystrophy	hsa-mir-133a	0.206491
Coronary Artery Disease	hsa-mir-155	0.206467
Thyroid Neoplasms	hsa-let-7i	0.206429
lymphoma	hsa-mir-106a	0.206389
Waldenstrom Macroglobulinemia	hsa-mir-342	0.206343
Lung Neoplasms	hsa-mir-151	0.20631
Endometrial Neoplasms	hsa-mir-16	0.206199
Thyroid Neoplasms	hsa-mir-181d	0.206179
Adenocarcinoma	hsa-mir-100	0.206173
Glioma	hsa-mir-495	0.206164
Carcinoma	hsa-mir-146a	0.206022
Neoplasms	hsa-mir-198	0.206001
Digestive System Neoplasms	hsa-mir-375	0.205945
Endometrial Neoplasms	hsa-mir-146a	0.205594
Carcinoma, Renal Cell	hsa-mir-451	0.205572
Liver Diseases, Alcoholic	hsa-mir-122	0.20533
Adenocarcinoma	hsa-mir-135b	0.20531
Lung Neoplasms	hsa-mir-129	0.205257
Glioma	hsa-mir-513a	0.205091
medulloblastoma	hsa-mir-371a	0.205031
Hematologic Neoplasms	hsa-mir-21	0.204952
Colorectal Neoplasms	hsa-mir-204	0.204943
Carcinoma	hsa-mir-93	0.20493
Precursor Cell Lymphoblastic Leukemia-Lymphoma	hsa-mir-16	0.204893
Melanoma	hsa-mir-28	0.20482
Heart Failure	hsa-mir-181b	0.204639
Prostatic Neoplasms	hsa-mir-219	0.204594
Osteosarcoma	hsa-mir-23b	0.204533
Pancreatic Neoplasms	hsa-mir-137	0.204513
Leukemia, lymphoblastic, Chronic	hsa-mir-125b	0.204366
Ovarian Neoplasms	hsa-mir-95	0.204333
Carcinoma, Basal Cell	hsa-mir-96	0.204276
Heart Failure	hsa-mir-206	0.204174
Glioma	hsa-mir-32	0.204171
Retinoblastoma	hsa-mir-27b	0.204054
Neoplasms	hsa-mir-10a	0.204019
Parkinson Disease	hsa-mir-17	0.203943
Carcinoma	hsa-mir-451	0.203874
Endometriosis	hsa-mir-192	0.20385
Adenocarcinoma	hsa-mir-23b	0.203812
Lung Neoplasms	hsa-mir-376c	0.203707
Myelodysplastic Syndromes	hsa-mir-133a	0.203701
Diabetic Nephropathies	hsa-mir-429	0.203666
Heart Failure	hsa-mir-25	0.203463
Carcinoma, Non-Small-Cell Lung	hsa-mir-99b	0.203365
Breast Neoplasms	hsa-mir-658	0.203288
Acute Coronary Syndrome	hsa-mir-21	0.203208
Colorectal Neoplasms	hsa-mir-153	0.203103
Carcinoma Hepatocellular	hsa-mir-33a	0.203101
Urinary Bladder Neoplasms	hsa-mir-198	0.20308
Carcinoma, Non-Small-Cell Lung	hsa-mir-198	0.203009
Urinary Bladder Neoplasms	hsa-mir-148a	0.202962
Leukemia-Lymphoma, Adult T-Cell	hsa-mir-15a	0.202893
Prostatic Neoplasms	hsa-mir-302c	0.202836
Thyroid Neoplasms	hsa-let-7b	0.202829
Carcinoma, Non-Small-Cell Lung	hsa-mir-140	0.202808
Lymphoproliferative Disorders	hsa-mir-155	0.202798
Crohn Disease	hsa-mir-21	0.202759
Glioma	hsa-mir-379	0.20262
Uterine Cervical Neoplasms	hsa-mir-18b	0.202591
Hypertrophy	hsa-mir-150	0.202497
Multiple Myeloma	hsa-mir-29a	0.202321
Glioma	hsa-mir-141	0.202249
Multiple Myeloma	hsa-mir-145	0.202132
Laryngeal Neoplasms	hsa-mir-143	0.20212
Prostate Neoplasms	hsa-mir-100	0.202068
Gout	hsa-mir-526a	0.202062
Carcinoma, Squamous Cell	hsa-let-7b	0.201926
Pulmonary Disease, Chronic Obstructive	hsa-mir-34b	0.201924
medulloblastoma	hsa-mir-497	0.201909
Heart Failure	hsa-mir-222	0.201824
Breast Neoplasms	hsa-mir-181d	0.201781
Choriocarcinoma	hsa-mir-21	0.20166
Carcinoma Hepatocellular	hsa-mir-154	0.201553
Leukemia, Lymphocytic, Chronic, B-Cell	hsa-mir-132	0.201533
Huntington Disease	hsa-mir-200b	0.201509
Biliary Tract Neoplasms	hsa-let-7a	0.201451
Osteosarcoma	hsa-mir-206	0.201423
lymphoma	hsa-mir-10b	0.201389
Irritable Bowel Syndrome	hsa-mir-29b	0.201307
Esophageal Neoplasms	hsa-mir-224	0.201136
Endometriosis	hsa-mir-101	0.201131
Gastrointestinal Neoplasms	hsa-let-7c	0.201057
Osteosarcoma	hsa-mir-145	0.201046
Adenocarcinoma	hsa-mir-224	0.200916
Uterine Cervical Neoplasms	hsa-mir-339	0.200868
Glioblastoma	hsa-mir-338	0.200832
Ependymoma	hsa-mir-124	0.200819
Gout	hsa-mir-520c	0.20079
Leukemia, Myeloid, Acute	hsa-mir-660	0.200767
Hematologic Neoplasms	hsa-mir-155	0.200686
Urinary Bladder Neoplasms	hsa-mir-153	0.200675
Lung Neoplasms	hsa-mir-130b	0.200543
Adenocarcinoma	hsa-let-7d	0.200471
Head and Neck Neoplasms	hsa-mir-34b	0.200372
Head and Neck Neoplasms	hsa-mir-15b	0.200359
Stomach Neoplasms	hsa-mir-154	0.20022
Carcinoma, Squamous Cell	hsa-mir-198	0.200193
Leukemia	hsa-mir-34b	0.200169
HIV	hsa-mir-29b	0.200047
Endothelium, Vascular	hsa-mir-222	0.200038
Carcinoma Hepatocellular	hsa-mir-638	0.200015
Sarcoma, Ewing's	hsa-mir-21	0.199999
Adenocarcinoma	hsa-mir-148a	0.199992
Pancreatic Neoplasms	hsa-mir-7	0.199989
Lupus Erythematosus, Systemic	hsa-mir-34a	0.199987
Carcinoma Hepatocellular	hsa-mir-455	0.19989
Endometriosis	hsa-mir-205	0.199839
Prostatic Neoplasms	hsa-mir-28	0.199789
Glioblastoma	hsa-mir-199a	0.199781
Thyroid Neoplasms	hsa-mir-214	0.199617
Adenocarcinoma	hsa-mir-132	0.199596
Carcinoma Hepatocellular	hsa-mir-301b	0.1995
Mouth Neoplasms	hsa-mir-9	0.199499
Colorectal Neoplasms	hsa-mir-520b	0.199473
Leukemia, Myeloid, Acute	hsa-mir-1	0.199453
Biliary Tract Neoplasms	hsa-let-7d	0.199366
Hepatitis B	hsa-mir-16	0.199361
Glioma	hsa-mir-494	0.19934
Ovarian Neoplasms	hsa-mir-32	0.199337
Mouth Neoplasms	hsa-mir-155	0.19931
Eosinophilic Esophagitis	hsa-mir-143	0.199261
Stomach Neoplasms	hsa-mir-486	0.19924
Endometrial Neoplasms	hsa-mir-98	0.199183
Stomach Neoplasms	hsa-mir-451a	0.199175
lymphoma	hsa-mir-222	0.19915
Schizophrenia	hsa-mir-19a	0.199014
Fatty Liver	hsa-mir-122	0.198993
Multiple Sclerosis	hsa-mir-29c	0.198897
Esophageal Neoplasms	hsa-mir-151	0.198809
Asthma	hsa-mir-21	0.198646
Head and Neck Neoplasms	hsa-mir-20b	0.198611
Leukemia, Myeloid, Acute	hsa-mir-132	0.198523
Neoplasms	hsa-mir-124	0.198486
Liver Neoplasms	hsa-mir-221	0.198446
Atherosclerosis	hsa-mir-29a	0.198434
Carcinoma, Squamous Cell	hsa-mir-29b	0.198431
Carcinoma	hsa-mir-18a	0.198378
Carcinoma, Non-Small-Cell Lung	hsa-mir-335	0.198344
Mesothelioma	hsa-mir-24	0.198322
Carcinoma	hsa-mir-25	0.19827
Reperfusion Injury	hsa-mir-155	0.198172
Astrocytoma	hsa-mir-195	0.198159
Mouth Neoplasms	hsa-mir-143	0.198094
Adenoviridae Infections	hsa-let-7c	0.197943
Glioma	hsa-mir-451	0.197843
Head and Neck Neoplasms	hsa-mir-196a	0.197821
Carcinoma, Squamous Cell	hsa-mir-148b	0.197717
Leukemia, Myeloid, Acute	hsa-mir-205	0.197647
Gastrointestinal Neoplasms	hsa-let-7i	0.197615
Lung Neoplasms	hsa-mir-339	0.197568
Carcinoma	hsa-let-7d	0.197473
Mesothelioma	hsa-mir-9	0.197392
Leukemia, Lymphocytic, Chronic, B-Cell	hsa-mir-26a	0.197327
Head and Neck Neoplasms	hsa-mir-24	0.197324
Kidney Neoplasms	hsa-mir-429	0.197288
Neoplasms	hsa-mir-99b	0.197194
Breast Neoplasms	hsa-mir-376a	0.197061
Retinoblastoma	hsa-mir-34b	0.196908
Lung Diseases, Interstitial	hsa-mir-19b	0.196889
Thyroid Neoplasms	hsa-mir-125a	0.196784
Osteosarcoma	hsa-mir-101	0.196772
Carcinoma, Squamous Cell	hsa-mir-494	0.196485
Carcinoma, Renal Cell	hsa-mir-106a	0.196413
Endometrial Neoplasms	hsa-mir-196a	0.196317
Endometriosis	hsa-mir-221	0.196283
Adenocarcinoma	hsa-mir-27a	0.196176
Mycosis Fungoides	hsa-mir-19a	0.196039
Carcinoma, Renal Cell	hsa-mir-95	0.19602
Adrenocortical Carcinoma	hsa-mir-34a	0.195927
lymphoma	hsa-mir-143	0.195904
Mouth Neoplasms	hsa-mir-1	0.195846
Esophageal Neoplasms	hsa-mir-24	0.195785
Myelodysplastic Syndromes	hsa-mir-15b	0.195768
Brain Neoplasms	hsa-mir-221	0.195691
Nasopharyngeal Neoplasms	hsa-mir-125b	0.195495
Lymphoma, B-Cell	hsa-let-7a	0.195374
Prostate Neoplasms	hsa-mir-143	0.195242
Hepatitis C	hsa-mir-146a	0.195129
Astrocytoma	hsa-mir-17	0.195122
Head and Neck Neoplasms	hsa-mir-184	0.195087
Prostatic Neoplasms	hsa-mir-367	0.195074
Carcinoma, Non-Small-Cell Lung	hsa-mir-342	0.195007
Leukemia, Lymphocytic, Chronic, B-Cell	hsa-mir-199b	0.194989
Adrenal Cortex Neoplasms	hsa-mir-483	0.194904
Carcinoma Hepatocellular	hsa-mir-153	0.19473
Nasopharyngeal Neoplasms	hsa-mir-133a	0.19456
Liposarcoma	hsa-let-7c	0.194451
Carcinoma	hsa-mir-204	0.194418
Laryngeal Neoplasms	hsa-mir-146a	0.194396
Glioblastoma	hsa-mir-149	0.194302
Glioma	hsa-mir-429	0.19428
Neoplasms	hsa-mir-363	0.194066
Esophageal Neoplasms	hsa-mir-182	0.194025
Cholangiocarcinoma	hsa-mir-145	0.194001
Carcinoma, Renal Cell	hsa-mir-302a	0.193917
Lymphoma, B-Cell	hsa-mir-146b	0.193903
Lung Neoplasms	hsa-mir-148b	0.193898
Ovarian Neoplasms	hsa-mir-124	0.193882
Glioblastoma	hsa-mir-326	0.193838
Prostatic Neoplasms	hsa-mir-144	0.193776
Ovarian Neoplasms	hsa-mir-301a	0.193768
Waldenstrom Macroglobulinemia	hsa-mir-21	0.193755
Carcinoma	hsa-mir-223	0.193735
Carcinoma, Squamous Cell	hsa-mir-107	0.193726
Retinoblastoma	hsa-mir-195	0.193721
Endometriosis	hsa-mir-127	0.193687
Endometriosis	hsa-mir-16	0.193675
Carcinoma, Renal Cell	hsa-mir-488	0.19366
Neoplasms, Squamous Cell	hsa-mir-106a	0.193642
Leukemia, Lymphocytic, Chronic, B-Cell	hsa-mir-145	0.193626
Glioblastoma	hsa-mir-339	0.193599
Breast Neoplasms	hsa-mir-363	0.193478
Hepatitis B	hsa-mir-19a	0.193464
Pituitary Neoplasms	hsa-mir-221	0.193463
Pancreatic Neoplasms	hsa-mir-92b	0.193397
Adrenocortical Carcinoma	hsa-mir-141	0.193322
Head and Neck Neoplasms	hsa-mir-98	0.193312
Carcinoma	hsa-let-7c	0.193293
Laryngeal Neoplasms	hsa-mir-7	0.193214
Prostatic Neoplasms	hsa-mir-497	0.193212
Mouth Neoplasms	hsa-mir-29b	0.193133
Glioma	hsa-mir-409	0.193109
Head and Neck Neoplasms	hsa-mir-140	0.193029
Arthritis, Rheumatoid	hsa-mir-146b	0.192927
Parkinson Disease	hsa-mir-342	0.192924
Melanoma	hsa-mir-130b	0.192893
Testicular Neoplasms	hsa-mir-21	0.192873
Leukemia, Myeloid, Acute	hsa-mir-195	0.192751
Adenocarcinoma	hsa-mir-30c	0.192666
Prostatic Neoplasms	hsa-mir-10a	0.192618
Thyroid Neoplasms	hsa-mir-18a	0.192548
Parkinson Disease	hsa-mir-30e	0.192546
Astrocytoma	hsa-mir-135a	0.192365
Ovarian Neoplasms	hsa-mir-139	0.19225
Carcinoma, Renal Cell	hsa-mir-148a	0.192233
Adrenocortical Adenoma	hsa-mir-200c	0.192156
Laryngeal Neoplasms	hsa-mir-29c	0.19213
Endometrial Neoplasms	hsa-mir-375	0.19213
Pancreatic Neoplasms	hsa-mir-23b	0.192098
Astrocytoma	hsa-mir-146b	0.192083
Precursor Cell Lymphoblastic Leukemia-Lymphoma	hsa-mir-34c	0.192058
Carcinoma, Renal Cell	hsa-mir-107	0.19205
Thyroid Neoplasms	hsa-mir-199a	0.19199
Colon Neoplasms	hsa-mir-31	0.19198
Carcinoma, Squamous Cell	hsa-mir-335	0.191941
Liver Neoplasms	hsa-mir-199a	0.191871
medulloblastoma	hsa-mir-196a	0.191792
Endometrial Neoplasms	hsa-mir-34a	0.191722
Thyroid Neoplasms	hsa-mir-224	0.191692
Crohn Disease	hsa-let-7c	0.191671
Uterine Cervical Neoplasms	hsa-mir-373	0.191661
Ependymoma	hsa-mir-21	0.191539
Carcinoma	hsa-mir-133a	0.191474
Thyroid Neoplasms	hsa-mir-205	0.191442
Prostatic Neoplasms	hsa-mir-339	0.191435
Colonic Neoplasms	hsa-mir-153	0.191367
Diabetes Mellitus, Type 2	hsa-mir-155	0.191327
Heart Failure	hsa-mir-200b	0.191249
Pancreatic Neoplasms	hsa-mir-424	0.191127
Lung Neoplasms	hsa-mir-204	0.191043
Hepatitis C	hsa-mir-150	0.190942
Diabetic Nephropathies	hsa-mir-126	0.19094
Obesity	hsa-mir-19b	0.190902
Carcinoma, Squamous Cell	hsa-mir-130b	0.19085
Glioblastoma	hsa-mir-137	0.190782
Carcinoma	hsa-mir-15a	0.190632
Glioblastoma	hsa-mir-187	0.190523
Astrocytoma	hsa-mir-34a	0.190474
Stomach Neoplasms	hsa-mir-423	0.190345
Oligodendroglioma	hsa-mir-21	0.190329
Tongue Neoplasms	hsa-mir-31	0.190285
Stomach Neoplasms	hsa-mir-455	0.190113
Carcinoma, Squamous Cell	hsa-mir-23a	0.190011
Multiple Myeloma	hsa-mir-9	0.189951
Glioma	hsa-mir-184	0.189945
Bladder Neoplasms	hsa-mir-378a	0.189917
Hepatitis B	hsa-mir-93	0.189912
Biliary Tract Neoplasms	hsa-let-7c	0.189847
Heart Failure	hsa-mir-146b	0.189761
Gastrointestinal Neoplasms	hsa-mir-148b	0.189732
Adenocarcinoma	hsa-mir-137	0.189673
Hepatitis C	hsa-mir-126	0.189669
Laryngeal Neoplasms	hsa-mir-9	0.18964
Myocardium	hsa-mir-29b	0.189528
Colorectal Neoplasms	hsa-mir-452	0.189487
medulloblastoma	hsa-mir-210	0.189465
Glioma	hsa-mir-328	0.189444
Colorectal Neoplasms	hsa-mir-197	0.189285
Hyperglycemia	hsa-mir-222	0.189223
Adenocarcinoma	hsa-mir-15b	0.189215
Uterine Cervical Neoplasms	hsa-mir-383	0.189188
Neuroblastoma	hsa-mir-181b	0.189138
Hepatitis B	hsa-mir-223	0.189094
Adenoviridae Infections	hsa-mir-139	0.189093
Arrhythmias, Cardiac	hsa-mir-30b	0.189091
Carcinoma, Squamous Cell	hsa-mir-30c	0.18902
Head and Neck Neoplasms	hsa-mir-192	0.188989
Glioblastoma	hsa-mir-152	0.18892
Prostatic Neoplasms	hsa-mir-376a	0.188914
Carcinoma, Renal Cell	hsa-mir-373	0.188906
Urinary Bladder Neoplasms	hsa-mir-30a	0.188893
Barrett Esophagus	hsa-mir-183	0.18888
Glioblastoma	hsa-mir-219	0.188825
Thyroid Neoplasms	hsa-mir-29c	0.188781
Endometrial Neoplasms	hsa-mir-18a	0.188773
Pancreatic Neoplasms	hsa-mir-372	0.188683
lymphoma	hsa-mir-205	0.188678
Glioblastoma	hsa-let-7i	0.188585
Prostatic Neoplasms	hsa-mir-186	0.188572
lymphoma	hsa-mir-29b	0.188551
Leukemia, B-Cell	hsa-mir-146a	0.188527
Osteoarthritis	hsa-mir-15a	0.188507
Esophageal Neoplasms	hsa-mir-106b	0.188498
Uterine Cervical Neoplasms	hsa-mir-29c	0.188397
Ovarian Neoplasms	hsa-mir-130b	0.188345
Carcinoma, Squamous Cell	hsa-mir-212	0.188161
Carcinoma	hsa-mir-203	0.188155
Hepatitis C	hsa-mir-106b	0.188144
Liver Cirrhosis	hsa-mir-122	0.188125
Neoplasms	hsa-mir-212	0.18799
lymphoma	hsa-mir-96	0.187823
Urinary Bladder Neoplasms	hsa-mir-339	0.187758
Ovarian Neoplasms	hsa-mir-181c	0.187732
Glioma	hsa-mir-206	0.18758
medulloblastoma	hsa-mir-196b	0.187551
Kidney Diseases	hsa-mir-21	0.187544
Adenocarcinoma	hsa-mir-29b	0.187516
Heart Failure	hsa-mir-335	0.187451
Thyroid Neoplasms	hsa-mir-143	0.187395
Retinoblastoma	hsa-mir-218	0.187388
Retinoblastoma	hsa-mir-196a	0.187382
Head and Neck Neoplasms	hsa-mir-206	0.187337
Leukemia, Myeloid, Acute	hsa-mir-107	0.1873
Mycosis Fungoides	hsa-let-7e	0.187178
Esophageal Neoplasms	hsa-mir-181b	0.187149
Carcinoma, Non-Small-Cell Lung	hsa-mir-452	0.187132
Cervical Neoplasms	hsa-mir-21	0.18702
Parkinson Disease	hsa-mir-196a	0.18697
Adrenocortical Carcinoma	hsa-mir-151	0.186887
Heart Failure	hsa-mir-93	0.186788
Head and Neck Neoplasms	hsa-mir-27a	0.186776
Adenocarcinoma	hsa-mir-18b	0.186748
Heart Failure	hsa-mir-451	0.1867
Stomach Neoplasms	hsa-mir-454	0.186656
Endometriosis	hsa-mir-183	0.186598
Leukemia, Myeloid, Acute	hsa-mir-663	0.186577
Periodontitis	hsa-let-7d	0.186567
Ovarian Neoplasms	hsa-mir-198	0.186561
Parkinson Disease	hsa-mir-146a	0.186535
Esophageal Neoplasms	hsa-mir-7	0.186497
Carcinoma Hepatocellular	hsa-mir-383	0.186384
Gastrointestinal Neoplasms	hsa-let-7e	0.186376
ACTH-Secreting Pituitary Adenoma	hsa-mir-15b	0.186374
Osteosarcoma	hsa-mir-200a	0.18635
Esophageal Neoplasms	hsa-mir-122	0.186222
Myelodysplastic Syndromes	hsa-mir-92a	0.186188
Endometriosis	hsa-mir-133a	0.186164
Atherosclerosis	hsa-mir-199a	0.186151
Thyroid Neoplasms	hsa-mir-210	0.18612
Hepatoblastoma	hsa-mir-143	0.186092
Eosinophilic Esophagitis	hsa-mir-125b	0.18607
Gout	hsa-mir-515	0.185817
Melanoma	hsa-mir-26b	0.185811
Thyroid Neoplasms	hsa-mir-17	0.185646
Arthritis, Rheumatoid	hsa-mir-21	0.185513
Pancreatic Neoplasms	hsa-mir-130a	0.18548
Uterine Cervical Neoplasms	hsa-let-7b	0.185415
Retinoblastoma	hsa-mir-181d	0.185405
Lymphoma, T-Cell	hsa-mir-15a	0.185368
Carcinoma Hepatocellular	hsa-mir-363	0.185324
Leukemia, Myeloid	hsa-mir-181a	0.185287
Hodgkin Disease	hsa-mir-125b	0.185111
Neuroblastoma	hsa-mir-155	0.185032
Neoplasms	hsa-mir-497	0.184893
Carcinoma, Renal Cell	hsa-mir-375	0.184864
Leukemia, Acute	hsa-mir-221	0.184846
Gastric Neoplasms	hsa-mir-375	0.184752
Carcinoma, Squamous Cell	hsa-mir-15b	0.18465
Adenocarcinoma	hsa-mir-150	0.184613
Prostatic Neoplasms	hsa-mir-30e	0.184565
Hepatitis C	hsa-mir-133a	0.184562
Head and Neck Neoplasms	hsa-mir-137	0.184442
Hepatitis B	hsa-let-7e	0.184432
Crohn Disease	hsa-mir-155	0.184432
Leukemia, Lymphocytic, Chronic, B-Cell	hsa-mir-199a	0.184401
lymphoma	hsa-mir-182	0.184326
Hypertension	hsa-mir-18a	0.184293
Osteosarcoma	hsa-mir-106a	0.184267
Stomach Neoplasms	hsa-mir-370	0.184242
Colorectal Neoplasms	hsa-mir-212	0.184211
Colonic Neoplasms	hsa-mir-99b	0.184208
Melanoma	hsa-mir-198	0.184089
Pancreatic Neoplasms	hsa-mir-153	0.184067
Small Cell Lung Carcinoma	hsa-mir-486	0.183952
Prostatic Neoplasms	hsa-mir-148b	0.18395
Neoplasms, Squamous Cell	hsa-mir-124	0.183944
Thyroid Neoplasms	hsa-mir-15a	0.183899
Pancreatic Neoplasms	hsa-mir-148b	0.183834
Leukemia, Myeloid, Acute	hsa-mir-214	0.183825
Prostatic Neoplasms	hsa-mir-140	0.183699
Endometriosis	hsa-mir-130a	0.183576
Bladder Neoplasms	hsa-mir-99a	0.183573
Bladder Neoplasms	hsa-mir-574	0.183427
Carcinoma	hsa-mir-20b	0.183416
Carcinoma, Non-Small-Cell Lung	hsa-mir-92b	0.18341
Bladder Neoplasms	hsa-mir-138	0.183403
Urinary Bladder Neoplasms	hsa-mir-26a	0.183301
Uterine Cervical Neoplasms	hsa-mir-29b	0.183233
Carcinoma, Non-Small-Cell Lung	hsa-mir-373	0.183185
Head and Neck Neoplasms	hsa-mir-214	0.183058
Leukemia, Myeloid, Acute	hsa-mir-454	0.18303
medulloblastoma	hsa-mir-26b	0.183015
Adenocarcinoma	hsa-mir-146b	0.182997
Multiple Myeloma	hsa-mir-206	0.182941
Myocardial Infarction	hsa-mir-19b	0.182912
Scleroderma, Systemic	hsa-mir-223	0.182887
Alzheimer Disease	hsa-mir-18a	0.182869
Colon Neoplasms	hsa-mir-18a	0.182867
Carcinoma	hsa-mir-150	0.182866
Lung Neoplasms	hsa-mir-340	0.182824
Aortic Aneurysm, Thoracic	hsa-mir-206	0.182664
Pre-Eclampsia	hsa-mir-1	0.182656
Neoplasms	hsa-mir-338	0.182627
Adenocarcinoma	hsa-mir-20b	0.18252
Mouth Neoplasms	hsa-mir-34b	0.182515
Liver Neoplasms	hsa-let-7a	0.182498
Neuroblastoma	hsa-mir-31	0.182461
Glioblastoma	hsa-mir-106a	0.18242
Carcinoma Hepatocellular	hsa-mir-204	0.182353
Carcinoma Hepatocellular	hsa-mir-302d	0.182276
Hepatitis C	hsa-mir-18a	0.182119
Glioblastoma	hsa-mir-128	0.182115
Mesothelioma	hsa-mir-125b	0.182083
Retinoblastoma	hsa-mir-93	0.182056
Colonic Neoplasms	hsa-mir-196b	0.181982
Prostate Neoplasms	hsa-mir-486	0.181967
Laryngeal Neoplasms	hsa-mir-223	0.181939
Uterine Cervical Neoplasms	hsa-let-7c	0.181902
Myocardial Infarction	hsa-mir-145	0.181816
Urinary Bladder Neoplasms	hsa-mir-215	0.181802
Hepatitis B	hsa-mir-145	0.181758
Myocardial Infarction	hsa-mir-29c	0.181669
Neoplasms, Squamous Cell	hsa-mir-125b	0.181659
medulloblastoma	hsa-mir-100	0.181656
Waldenstrom Macroglobulinemia	hsa-mir-16	0.181629
Carcinoma, Ehrlich Tumor	hsa-mir-145	0.181582
Eosinophilic Esophagitis	hsa-mir-126	0.181372
Alzheimer Disease	hsa-mir-19b	0.18126
Small Cell Lung Carcinoma	hsa-mir-499a	0.18125
Adenoviridae Infections	hsa-mir-195	0.181239
Retinoblastoma	hsa-mir-375	0.181228
Crohn Disease	hsa-let-7a	0.181221
Multiple Myeloma	hsa-mir-26a	0.181214
Heart Failure	hsa-mir-7	0.181194
Liver Neoplasms	hsa-mir-148a	0.181177
Gastric Neoplasms	hsa-mir-486	0.181152
Nasopharyngeal Neoplasms	hsa-mir-191	0.181136
Hepatitis B	hsa-mir-34c	0.180975
Retinoblastoma	hsa-mir-200b	0.180957
Stomach Neoplasms	hsa-mir-375	0.180947
Melanoma	hsa-mir-424	0.180943
Leukemia, B-Cell	hsa-mir-181a	0.18088
Neoplasms, Squamous Cell	hsa-mir-195	0.180835
Gastrointestinal Neoplasms	hsa-mir-100	0.180725
Endometrial Neoplasms	hsa-mir-101	0.180716
Nasopharyngeal Neoplasms	hsa-mir-126	0.180689
Mesothelioma	hsa-mir-27a	0.180634
lymphoma	hsa-mir-199b	0.180606
Carcinoma, Non-Small-Cell Lung	hsa-mir-137	0.180521
Nasopharyngeal Neoplasms	hsa-mir-145	0.180457
Osteosarcoma	hsa-mir-199b	0.180441
Cardiomegaly	hsa-mir-23a	0.180366
Gastric Neoplasms	hsa-mir-451a	0.180342
Nasopharyngeal Neoplasms	hsa-mir-25	0.180325
Retinoblastoma	hsa-mir-183	0.180298
Osteosarcoma	hsa-mir-132	0.180245
Cardiomyopathy, Hypertrophic	hsa-mir-30b	0.180237
Neuroblastoma	hsa-mir-143	0.180233
Leukemia, B-Cell	hsa-mir-223	0.180232
Waldenstrom Macroglobulinemia	hsa-mir-335	0.180203
Prostate Neoplasms	hsa-mir-141	0.180165
Myocardial Infarction	hsa-mir-30e	0.18014
Glioma	hsa-mir-133a	0.180054
Liver Neoplasms	hsa-mir-1	0.180012
Esophageal Neoplasms	hsa-mir-335	0.180012
Carcinoma, Renal Cell	hsa-mir-449a	0.179986
Carcinoma, Renal Cell	hsa-mir-149	0.179986
Glioblastoma	hsa-mir-296	0.17996
Carcinoma, Renal Cell	hsa-mir-181d	0.17991
Prostate Neoplasms	hsa-mir-708	0.179887
Atherosclerosis	hsa-mir-107	0.179881
Hepatitis B	hsa-mir-34a	0.179873
Adenocarcinoma	hsa-mir-24	0.179756
Leukemia, lymphoblastic, Chronic	hsa-mir-16	0.179697
Endometrial Neoplasms	hsa-mir-215	0.179572
Leukemia, Lymphocytic, Chronic, B-Cell	hsa-mir-191	0.179529
Carcinoma	hsa-mir-19b	0.179476
Colorectal Neoplasms, Hereditary Nonpolyposis	hsa-mir-21	0.179372
Neuroblastoma	hsa-mir-149	0.179334
Gastrointestinal Neoplasms	hsa-mir-34a	0.179326
Chordoma	hsa-mir-133a	0.179272
Inflammation	hsa-mir-16	0.179262
Melanoma	hsa-mir-216b	0.17918
Pituitary Adenomas	hsa-mir-16	0.1791
Uterine Cervical Neoplasms	hsa-mir-342	0.179084
Gastrointestinal Neoplasms	hsa-mir-223	0.179019
lymphoma	hsa-mir-141	0.179001
Heart Failure	hsa-mir-127	0.178865
Head and Neck Neoplasms	hsa-mir-199a	0.178799
Glioma	hsa-mir-99a	0.178617
Liver Neoplasms	hsa-let-7c	0.178603
Pancreatic Neoplasms	hsa-mir-342	0.178594
Colorectal Neoplasms	hsa-mir-494	0.178574
Infertility, Male	hsa-mir-34b	0.178497
Cervical Neoplasms	hsa-mir-125b	0.17844
Endometrial Neoplasms	hsa-mir-199a	0.178437
Adrenocortical Carcinoma	hsa-mir-183	0.178337
Endometrial Neoplasms	hsa-mir-135b	0.178311
Carcinoma, Non-Small-Cell Lung	hsa-mir-338	0.17823
Glioma	hsa-mir-130a	0.178203
Myelodysplastic Syndromes	hsa-mir-19a	0.178141
Parkinson Disease	hsa-mir-206	0.178006
Multiple Myeloma	hsa-mir-195	0.17795
Muscular Disorders, Atrophic	hsa-let-7a	0.177922
Parkinson Disease	hsa-mir-376c	0.177916
Neoplasms, Squamous Cell	hsa-mir-145	0.177863
Adenocarcinoma	hsa-mir-199a	0.177841
Adrenocortical Carcinoma	hsa-mir-205	0.177835
Retinoblastoma	hsa-mir-128	0.177825
medulloblastoma	hsa-mir-185	0.177791
Gastric Neoplasms	hsa-mir-200a	0.177786
Mouth Neoplasms	hsa-mir-192	0.177781
Endomyocardial Fibrosis	hsa-mir-29b	0.177752
Neoplasms, Squamous Cell	hsa-mir-10b	0.177725
Lung Neoplasms	hsa-mir-491	0.177675
lymphoma	hsa-mir-542	0.177633
Ependymoma	hsa-mir-137	0.177576
Adenoviridae Infections	hsa-mir-34c	0.177533
Leukemia, B-Cell	hsa-mir-34a	0.177436
Pancreatic Neoplasms	hsa-mir-339	0.177341
Adenocarcinoma	hsa-mir-125a	0.177294
Multiple Sclerosis	hsa-let-7i	0.177277
Cervical Neoplasms	hsa-mir-27a	0.17711
Thyroid Neoplasms	hsa-mir-296	0.177004
Leukemia	hsa-mir-142	0.17699
Precursor Cell Lymphoblastic Leukemia-Lymphoma	hsa-mir-92a	0.176944
Pancreatic Neoplasms	hsa-mir-20b	0.176771
Leukemia, lymphoblastic, Acute	hsa-mir-181a	0.176679
Carcinoma, Squamous Cell	hsa-mir-194	0.176618
Lung Neoplasms	hsa-mir-423	0.176578
Retinoblastoma	hsa-mir-106a	0.17655
Glioblastoma	hsa-mir-30b	0.176496
Carcinoma, Endometrioid	hsa-mir-155	0.176493
Carcinoma, Basal Cell	hsa-mir-21	0.176481
Cardiomyopathy, Dilated	hsa-mir-133a	0.176397
Bladder Neoplasms	hsa-mir-21	0.17639
Colonic Neoplasms	hsa-mir-302c	0.176365
Hodgkin Disease	hsa-mir-20b	0.176315
Glioblastoma	hsa-mir-192	0.176209
Neoplasms, Squamous Cell	hsa-mir-34b	0.176175
Fatty Liver	hsa-mir-96	0.176111
Biliary Tract Neoplasms	hsa-mir-21	0.17609
Head and Neck Neoplasms	hsa-mir-29b	0.175863
Leukemia	hsa-mir-221	0.175856
Hepatitis B	hsa-mir-429	0.175791
Bladder Neoplasms	hsa-mir-378d	0.175747
Leukemia, Myeloid, Acute	hsa-mir-520b	0.175729
Leukemia, Myeloid, Acute	hsa-mir-30d	0.175718
Gastrointestinal Neoplasms	hsa-mir-133a	0.175682
Bladder Neoplasms	hsa-mir-378c	0.175658
Carcinoma	hsa-mir-7	0.175617
Leukemia, Lymphocytic, Chronic, B-Cell	hsa-mir-214	0.175585
Melanoma	hsa-mir-187	0.175572
Osteosarcoma	hsa-mir-141	0.175547
Adrenocortical Carcinoma	hsa-let-7i	0.175459
Glioma	hsa-mir-512	0.175434
Carcinoma Hepatocellular	hsa-mir-33b	0.175407
Lung Neoplasms	hsa-mir-342	0.1754
Carcinoma, Non-Small-Cell Lung	hsa-mir-520h	0.175399
Myocardium	hsa-mir-133a	0.175397
Gastrointestinal Neoplasms	hsa-mir-210	0.175298
Bladder Neoplasms	hsa-mir-378f	0.175255
Stomach Neoplasms	hsa-mir-381	0.175211
Leukemia, Lymphocytic, Chronic, B-Cell	hsa-mir-181d	0.175162
Osteosarcoma	hsa-mir-92b	0.175158
Parkinson Disease	hsa-mir-133a	0.175157
Adenocarcinoma	hsa-mir-30a	0.175137
Hepatitis B	hsa-mir-127	0.17512
Neoplasms, Squamous Cell	hsa-mir-93	0.175103
Stomach Neoplasms	hsa-mir-216b	0.17506
Ovarian Neoplasms	hsa-mir-516b	0.175011
lymphoma	hsa-mir-106b	0.17501
Hepatitis B	hsa-mir-196b	0.175009
Inflammatory Bowel Diseases	hsa-mir-126	0.174968
Eosinophilic Esophagitis	hsa-mir-29c	0.174943
Bladder Neoplasms	hsa-mir-378e	0.174938
Bladder Neoplasms	hsa-mir-378h	0.174897
Urinary Bladder Neoplasms	hsa-let-7i	0.174836
Carcinoma	hsa-mir-367	0.174805
Lung Neoplasms	hsa-mir-181d	0.174787
Endometriosis	hsa-mir-19a	0.174784
Acquired Immunodeficiency Syndrome	hsa-mir-29c	0.174686
Precursor Cell Lymphoblastic Leukemia-Lymphoma	hsa-mir-15a	0.174586
Lung Neoplasms	hsa-mir-452	0.174442
Myocardial Reperfusion Injury	hsa-mir-155	0.174425
Adenocarcinoma	hsa-mir-124	0.174419
Bladder Neoplasms	hsa-mir-378g	0.174384
Bladder Neoplasms	hsa-mir-378i	0.174379
Digestive System Neoplasms	hsa-mir-21	0.174332
Pre-Eclampsia	hsa-mir-18a	0.17429
Sjogren's Syndrome	hsa-mir-155	0.174164
Hepatitis C	hsa-let-7d	0.174137
Leukoplakia, Oral	hsa-mir-21	0.174124
Leukemia, lymphoblastic, Chronic	hsa-mir-223	0.174083
Osteoporosis	hsa-mir-1	0.174072
Carcinoma	hsa-mir-135a	0.174038
Leukemia, Promyelocytic, Acute	hsa-mir-29b	0.173965
Bladder Neoplasms	hsa-mir-378b	0.173926
Endometrial Neoplasms	hsa-mir-30d	0.173806
Breast Neoplasms	hsa-mir-211	0.173757
Leukemia, Myeloid, Acute	hsa-mir-30e	0.17375
Colonic Neoplasms	hsa-mir-197	0.173721
Glioblastoma	hsa-mir-510	0.173666
Eclampsia	hsa-mir-155	0.173606
Liver Neoplasms	hsa-mir-34b	0.173578
Pancreatic Neoplasms	hsa-mir-140	0.173549
Carcinoma	hsa-mir-199a	0.173537
Adenoviridae Infections	hsa-mir-451	0.173468
Carcinoma, Renal Cell	hsa-mir-338	0.173304
Uterine Cervical Neoplasms	hsa-mir-99b	0.173268
Hepatitis C	hsa-mir-92a	0.173261
Esophageal Neoplasms	hsa-mir-302c	0.173192
Lymphoma, Large-Cell, Anaplastic	hsa-mir-16	0.173181
Pancreatic Neoplasms	hsa-mir-30e	0.173141
Gastrointestinal Neoplasms	hsa-mir-143	0.173128
Stomach Neoplasms	hsa-mir-152	0.173124
Laryngeal Neoplasms	hsa-mir-17	0.173118
Esophageal Neoplasms	hsa-mir-302b	0.173077
Glioblastoma	hsa-mir-663	0.173072
Precursor B-Cell Lymphoblastic Leukemia-Lymphoma	hsa-mir-223	0.173042
Adrenal Cortex Neoplasms	hsa-mir-200c	0.173019
Muscular Disorders, Atrophic	hsa-mir-17	0.173006
Heart Failure	hsa-mir-194	0.172967
Melanoma	hsa-mir-152	0.172967
Muscular Disorders, Atrophic	hsa-let-7d	0.172959
Nasopharyngeal Neoplasms	hsa-mir-29a	0.172957
Uterine Cervical Neoplasms	hsa-mir-183	0.172938
Uterine Cervical Neoplasms	hsa-mir-150	0.172894
Neuroblastoma	hsa-mir-153	0.172871
Urinary Bladder Neoplasms	hsa-mir-424	0.172814
Myocardial Infarction	hsa-mir-18a	0.172787
Esophageal Neoplasms	hsa-let-7g	0.172763
Breast Neoplasms	hsa-mir-154	0.172749
Alzheimer Disease	hsa-mir-92a	0.172747
Bladder Neoplasms	hsa-mir-328	0.172676
Carcinoma Hepatocellular	hsa-mir-495	0.172645
Neoplasms, Squamous Cell	hsa-mir-15a	0.172621
Cholangiocarcinoma	hsa-mir-429	0.172591
Schizophrenia	hsa-mir-21	0.172583
Glioblastoma	hsa-mir-100	0.172562
Arrhythmias, Cardiac	hsa-mir-133b	0.172562
Lupus Erythematosus, Systemic	hsa-mir-181b	0.172555
Hepatitis B	hsa-mir-191	0.172519
Thyroid Neoplasms	hsa-mir-96	0.172473
Arrhythmias, Cardiac	hsa-mir-21	0.172387
Glioblastoma	hsa-mir-145	0.172292
Neuroma, Acoustic	hsa-mir-7	0.172261
Cervical Neoplasms	hsa-mir-100	0.172212
Colonic Neoplasms	hsa-mir-130b	0.172184
Leukemia	hsa-mir-29a	0.172176
Uterine Cervical Neoplasms	hsa-mir-135b	0.17214
Prostatic Neoplasms	hsa-mir-520b	0.172138
Leukemia, Lymphocytic, Chronic, B-Cell	hsa-mir-143	0.172042
Muscular Disorders, Atrophic	hsa-mir-125b	0.172024
Prostate Neoplasms	hsa-mir-203	0.171963
Urinary Bladder Neoplasms	hsa-mir-32	0.171901
lymphoma	hsa-mir-494	0.171869
Lung Neoplasms	hsa-mir-99a	0.171854
Prostate Neoplasms	hsa-mir-133b	0.171793
Myocardial Infarction	hsa-mir-221	0.171787
Urinary Bladder Neoplasms	hsa-let-7f	0.171767
Endometrial Neoplasms	hsa-mir-20a	0.171738
Retinoblastoma	hsa-mir-196b	0.171711
Lymphoma, Mantle-Cell	hsa-mir-125b	0.171654
Urinary Bladder Neoplasms	hsa-mir-193b	0.171607
Neoplasms, Squamous Cell	hsa-mir-34c	0.171603
Head and Neck Neoplasms	hsa-mir-29a	0.1716
Neuroblastoma	hsa-mir-221	0.171333
Glioblastoma	hsa-mir-504	0.171292
[truncated: 182,155 more rows]
